# Supplementary material
Source: PubMed Central journal article supplement (PMC6482409)
Supplement: MD-010-C9MD00036D-s001.pdf [file MD-010-C9MD00036D-s001.pdf]

*Supplementary data*  
*for*

**Novel carbohydrate modified berberine derivatives: Synthesis and *in vitro* anti-diabetic investigation**

Liwen Han,<sup>a,§</sup> Wenlong Sheng,<sup>a,§</sup> Xiaobin Li,<sup>a</sup> Sik Attila,<sup>b</sup> Houwen Lin,<sup>c</sup> Kechun Liu,<sup>a,\*</sup> Lizhen Wang,<sup>a,\*</sup>

<sup>a</sup> *Biology Institute, Qilu University of Technology (Shandong Academy of Sciences), Jinan 250014, Shandong Province, China*

<sup>b</sup> *Institute of Transdisciplinary Discoveries, University of Pecs, Pécs, Ifjúság útja 20, 7624, Hungary*

<sup>c</sup> *Research Center for Marine Drugs, State Key Laboratory of Oncogenes and Related Genes, Department of Pharmacy, Ren Ji Hospital, School of Medicine, Shanghai Jiao Tong University, Shanghai 200127, China*

<sup>§</sup> *These authors contributed equally to this paper*

<sup>\*</sup> *Corresponding authors. Tel.: +8613869197581; e-mail: wlzh1106@126.com (Lizhen Wang), liukechun2000@163.com (Kechun Liu)*

**Table of Contents**

|                                                                          |             |
|--------------------------------------------------------------------------|-------------|
| <sup>1</sup> H, <sup>13</sup> C NMR spectra of compound <b>8</b> -----   | pageS2-S3   |
| <sup>1</sup> H, <sup>13</sup> C NMR spectra of compound <b>13</b> -----  | pageS4-S5   |
| <sup>1</sup> H, <sup>13</sup> C NMR spectra of compound <b>1</b> -----   | pageS6-S7   |
| <sup>1</sup> H, <sup>13</sup> C NMR spectra of compound <b>14</b> -----  | pageS8-S9   |
| <sup>1</sup> H, <sup>13</sup> C NMR spectra of compound <b>2</b> -----   | pageS10-S11 |
| <sup>1</sup> H, <sup>13</sup> C NMR spectra of compound <b>19α</b> ----- | pageS12-S13 |
| <sup>1</sup> H, <sup>13</sup> C NMR spectra of compound <b>3</b> -----   | pageS14-S15 |
| <sup>1</sup> H, <sup>13</sup> C NMR spectra of compound <b>22</b> -----  | pageS16-S17 |
| <sup>1</sup> H, <sup>13</sup> C NMR spectra of compound <b>4</b> -----   | pageS18-S19 |
| <sup>1</sup> H, <sup>13</sup> C NMR spectra of compound <b>25</b> -----  | pageS20-S21 |
| <sup>1</sup> H, <sup>13</sup> C NMR spectra of compound <b>5</b> -----   | pageS22-S23 |



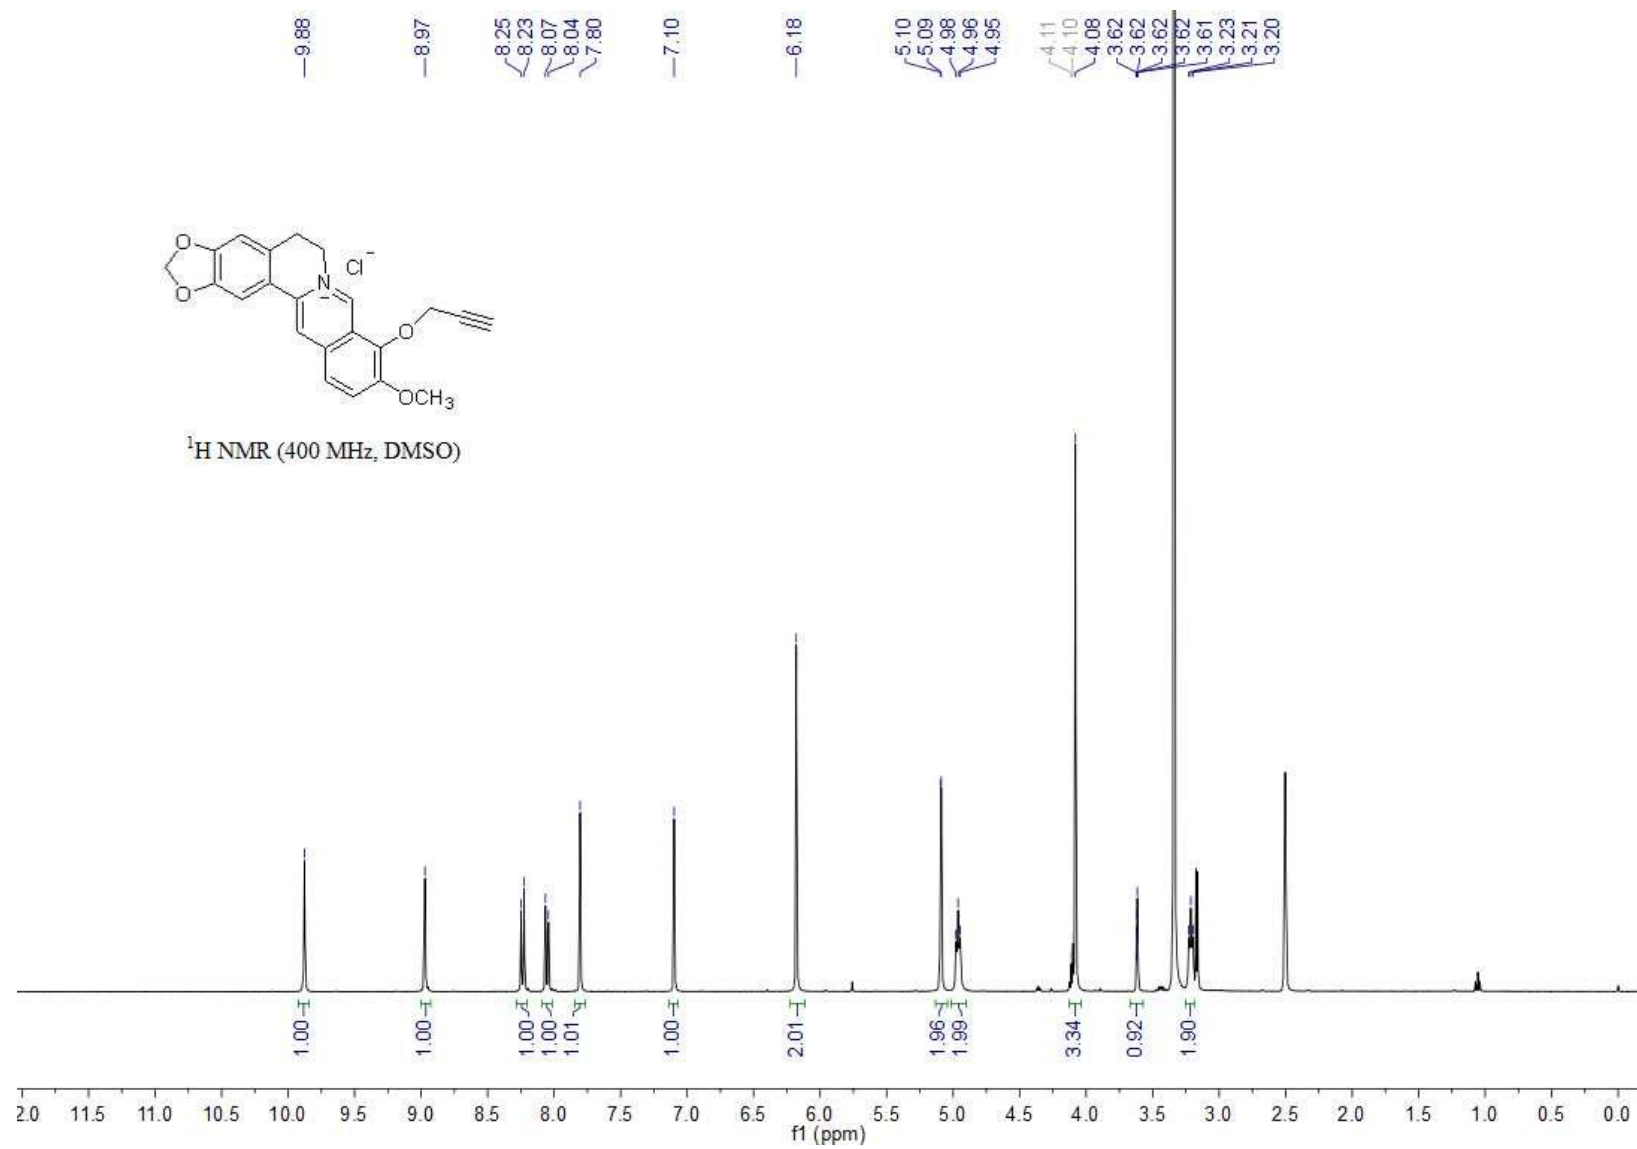

<sup>1</sup>H NMR spectrum of compound 8

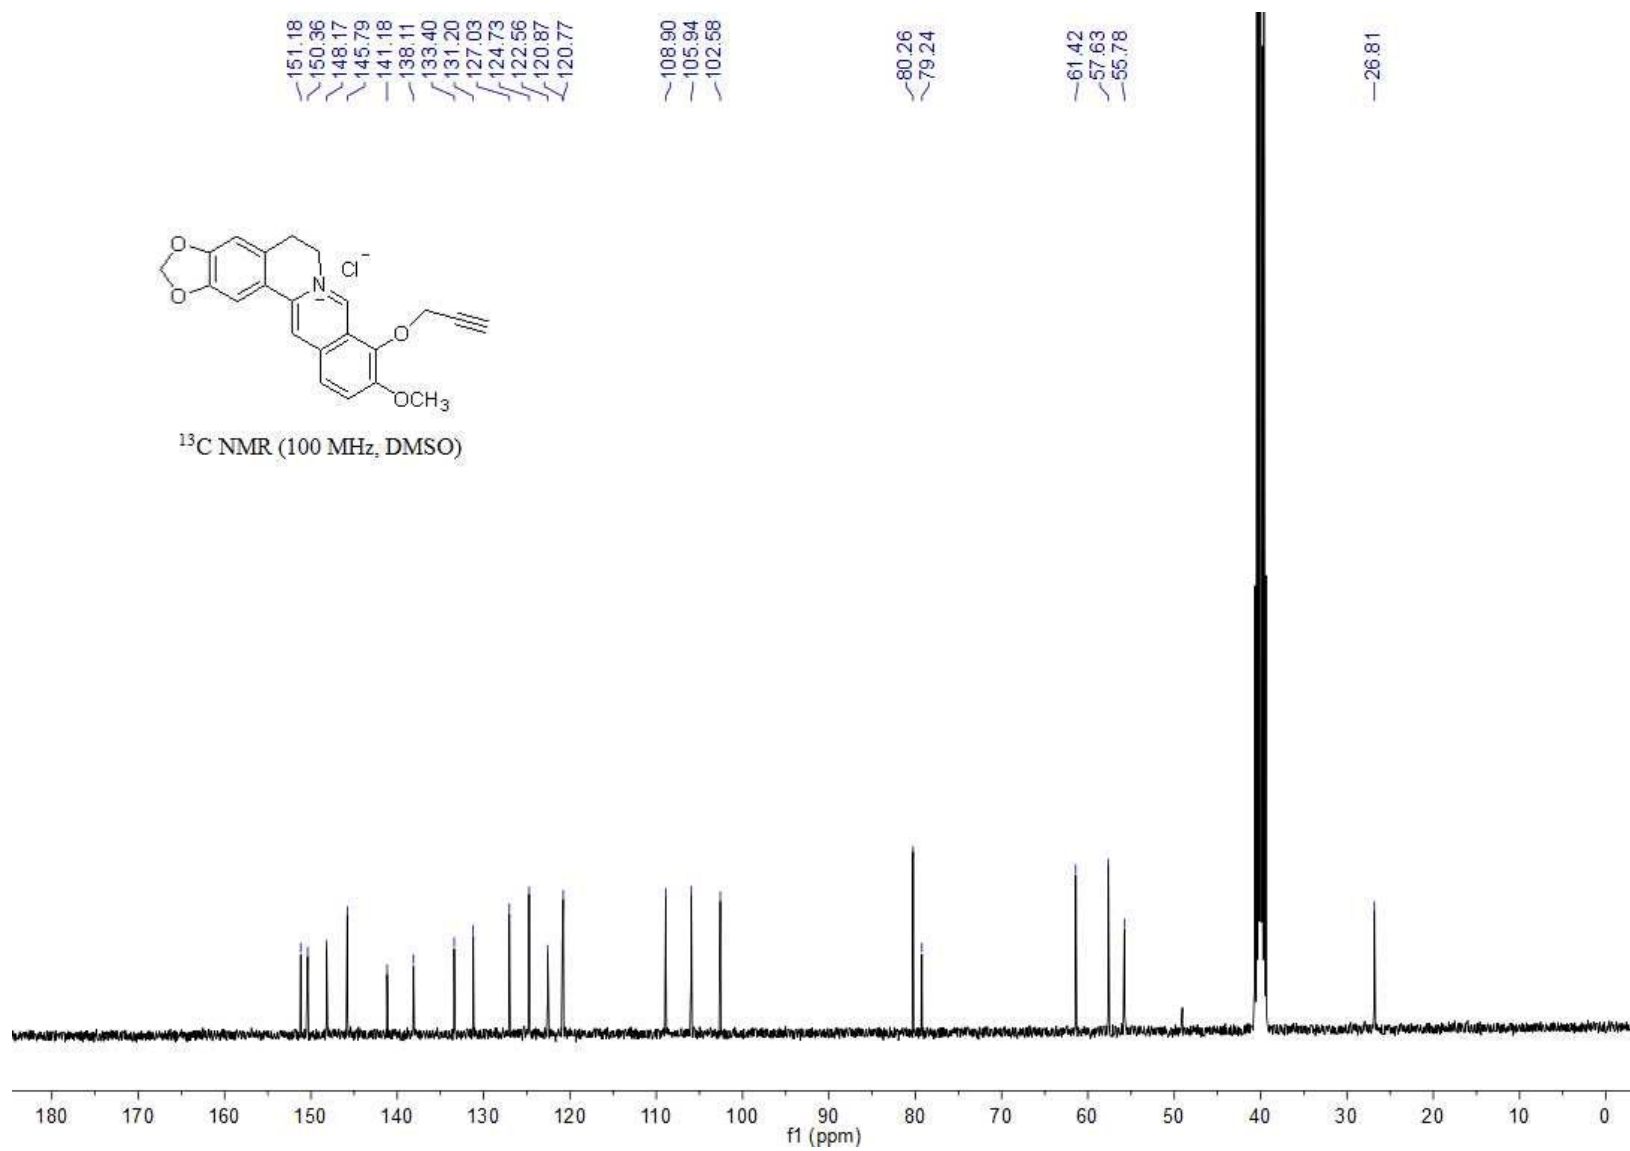

<sup>13</sup>C NMR spectrum of compound 8

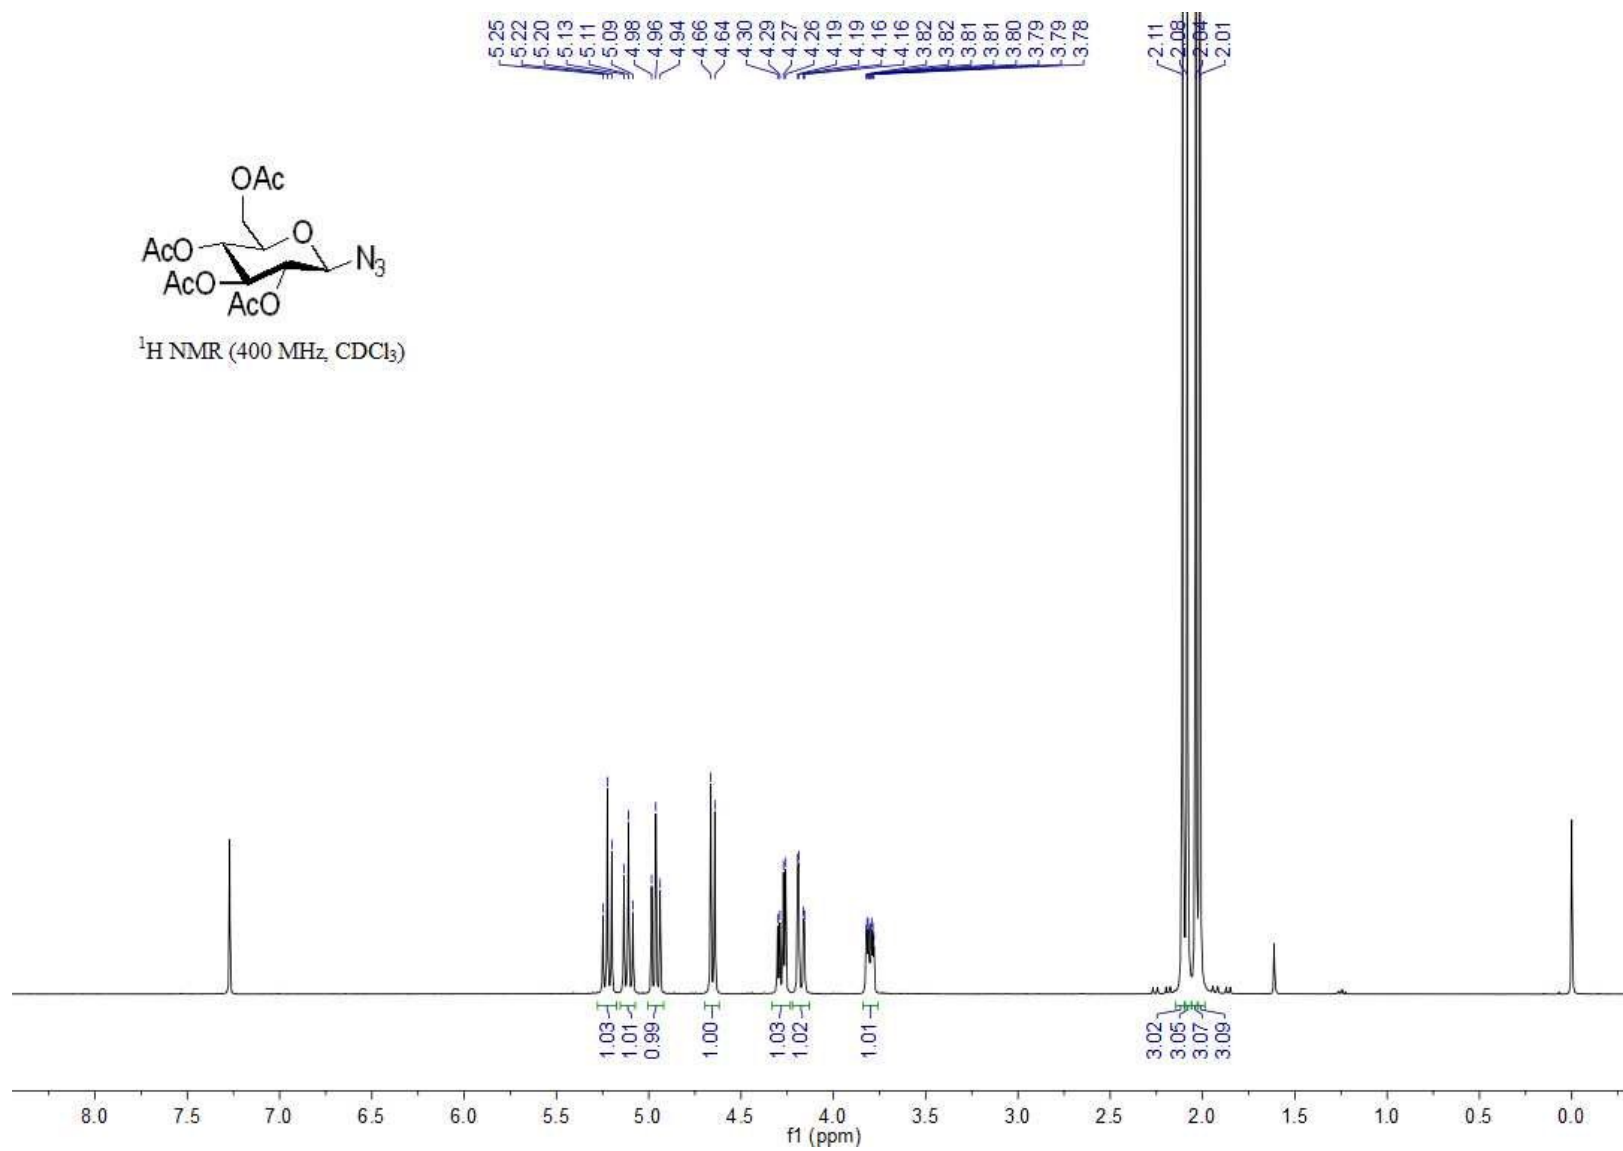

<sup>1</sup>H NMR spectrum of compound 13

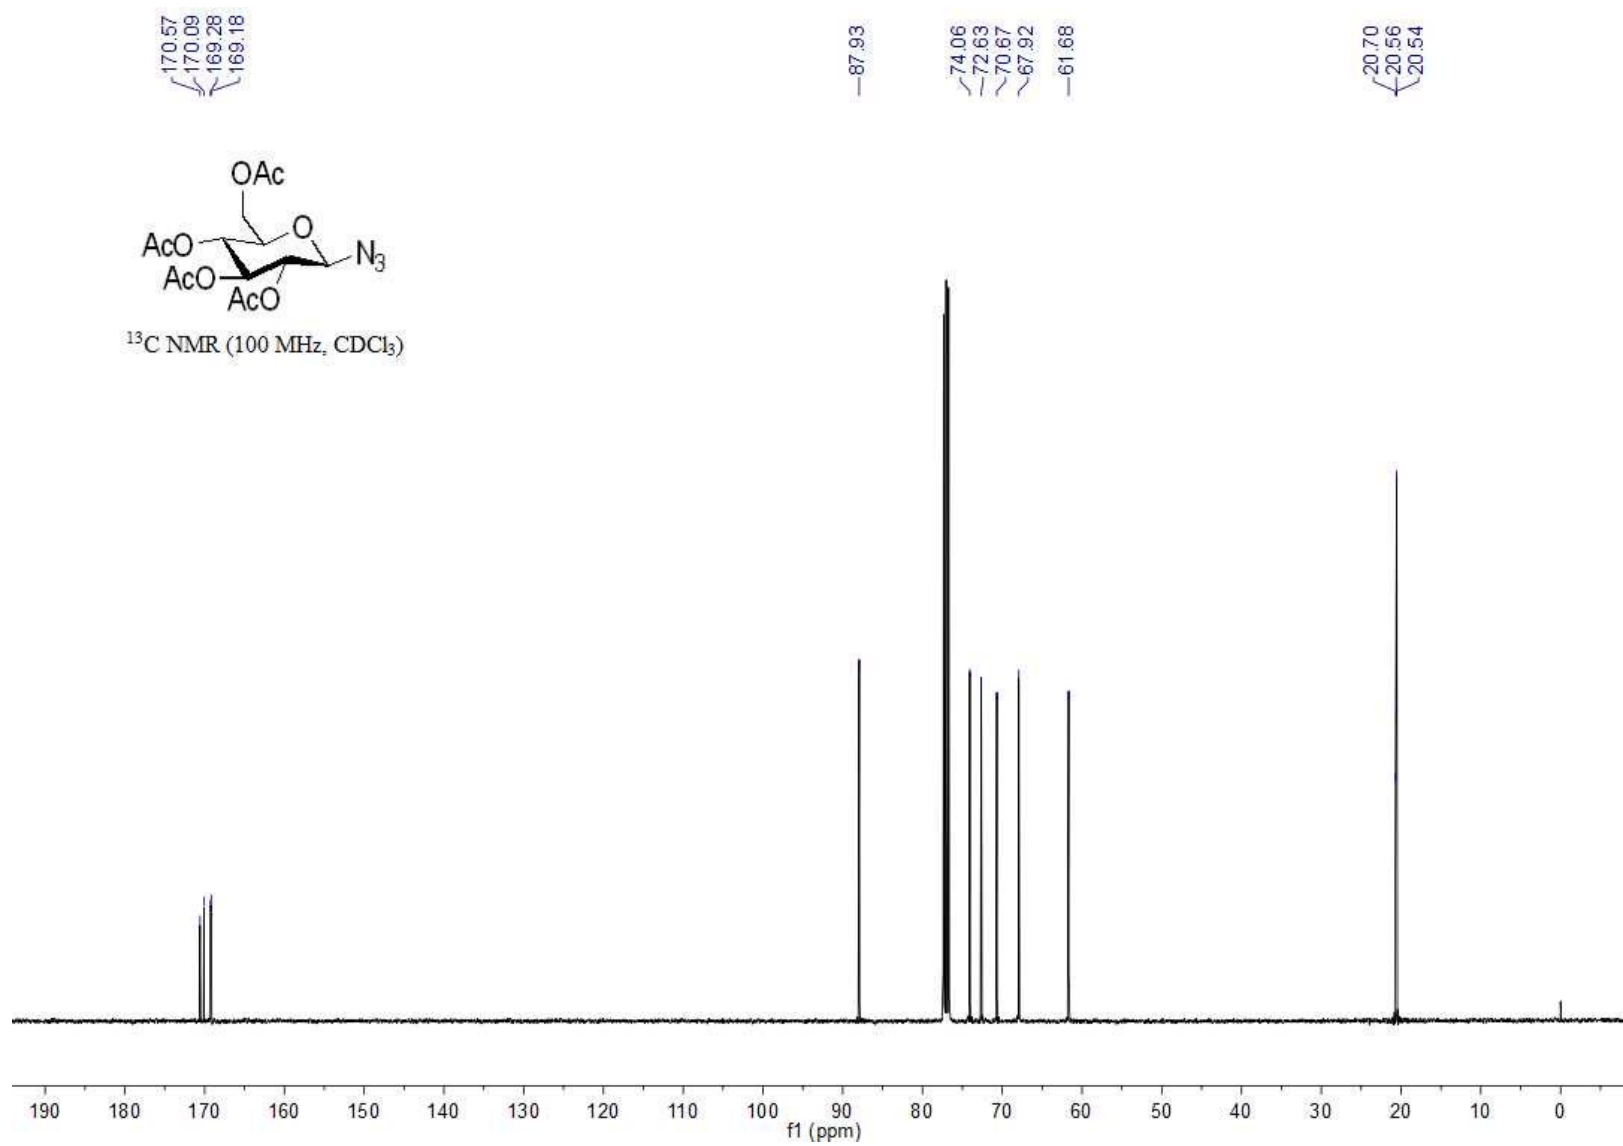

$^{13}\text{C}$  NMR spectrum of compound 13

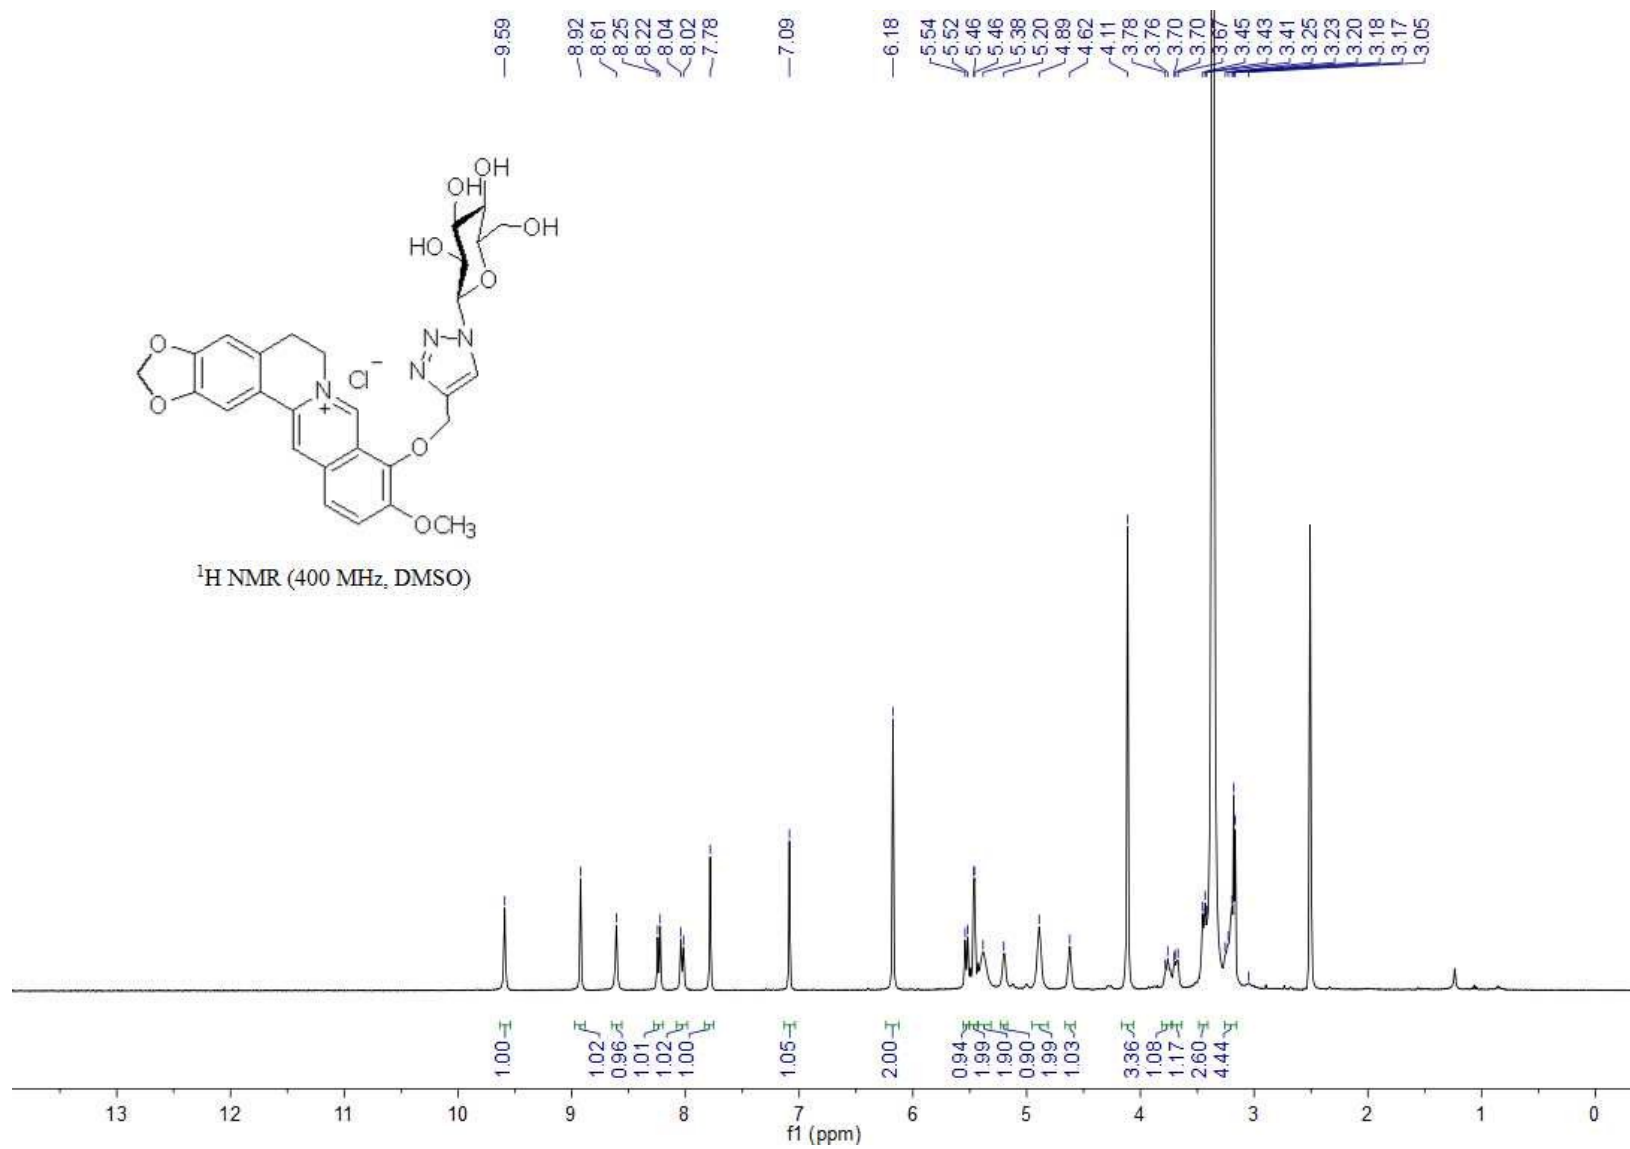

<sup>1</sup>H NMR spectrum of compound 1

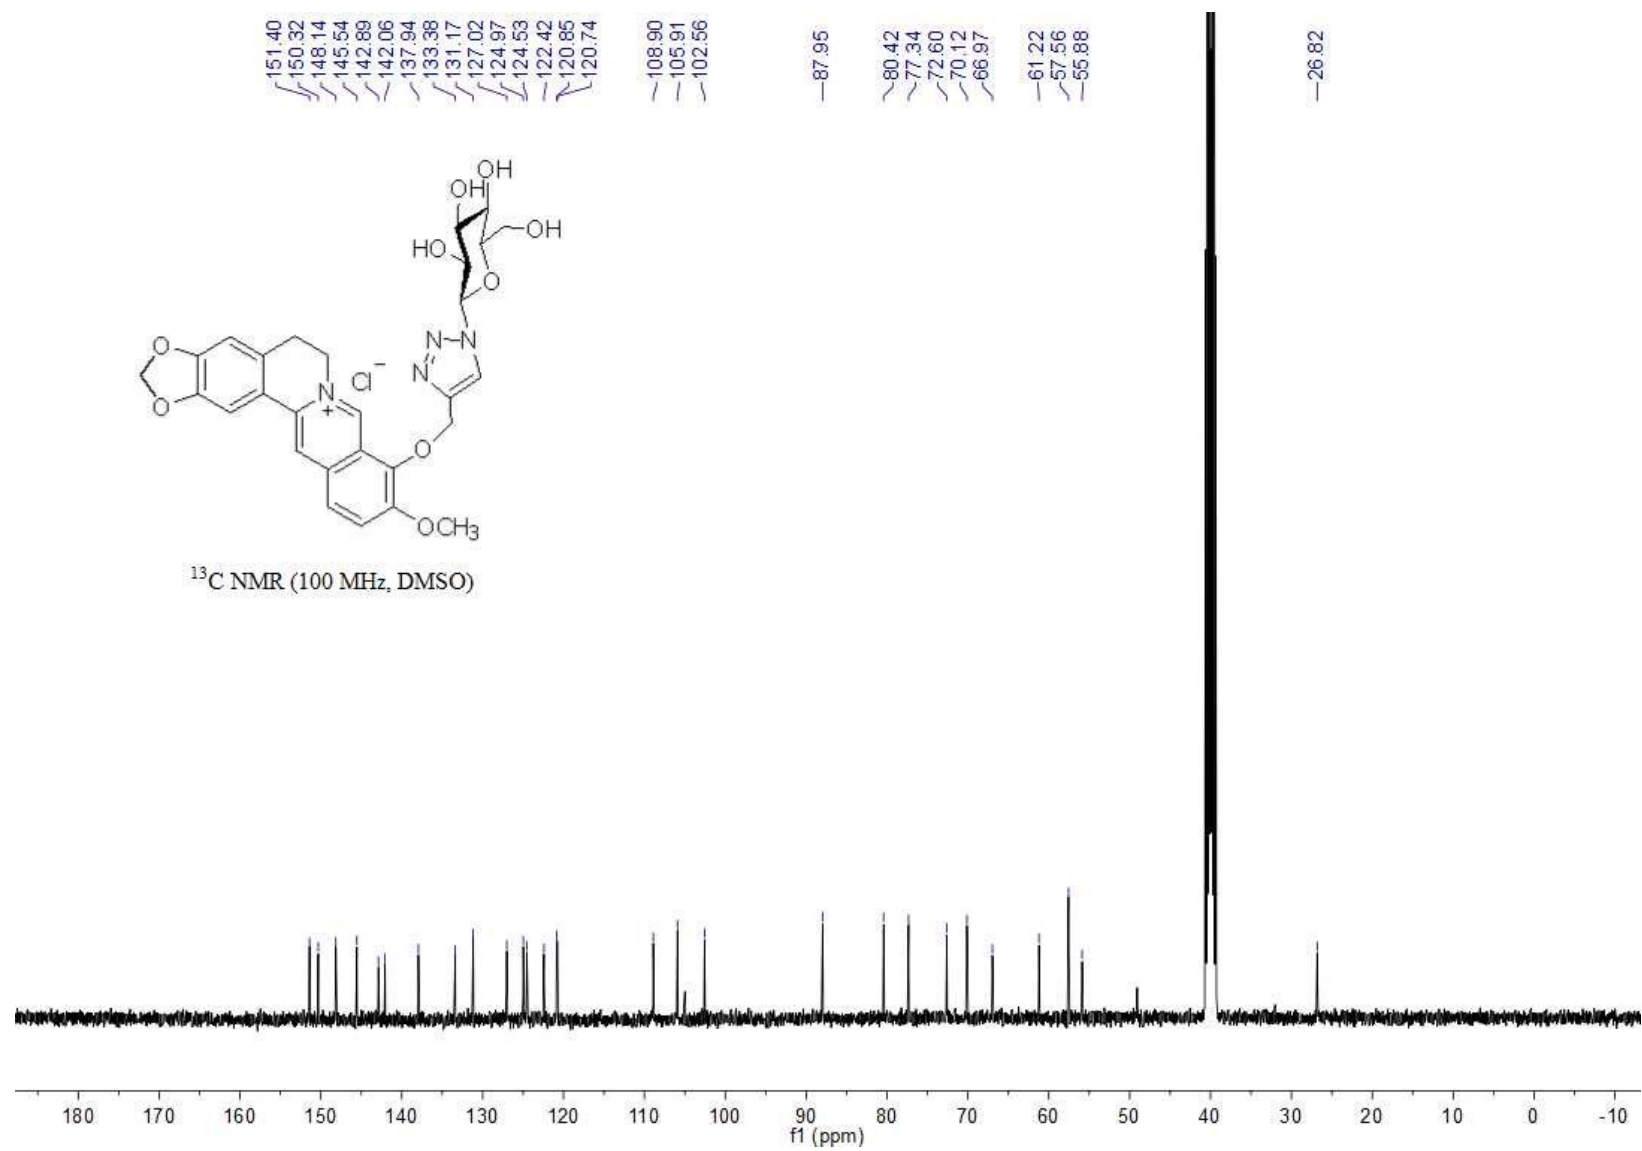

<sup>13</sup>C NMR spectrum of compound 1



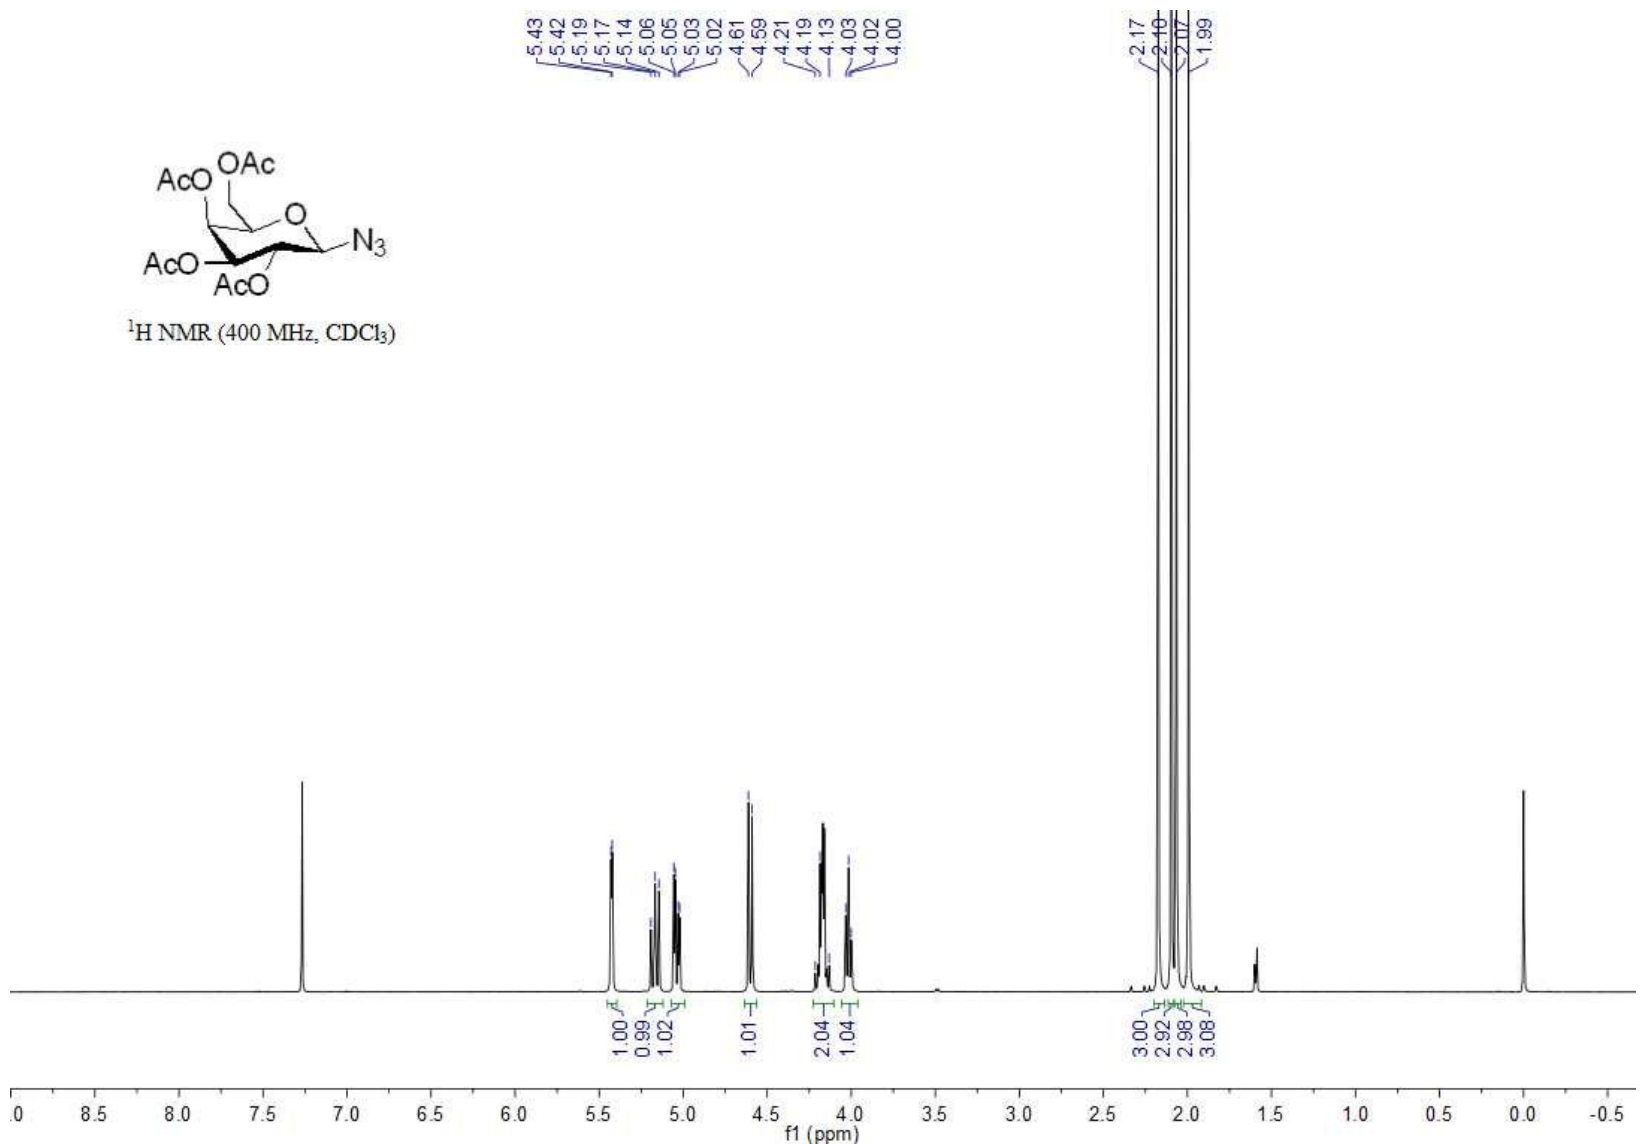

<sup>1</sup>H NMR spectrum of compound 14

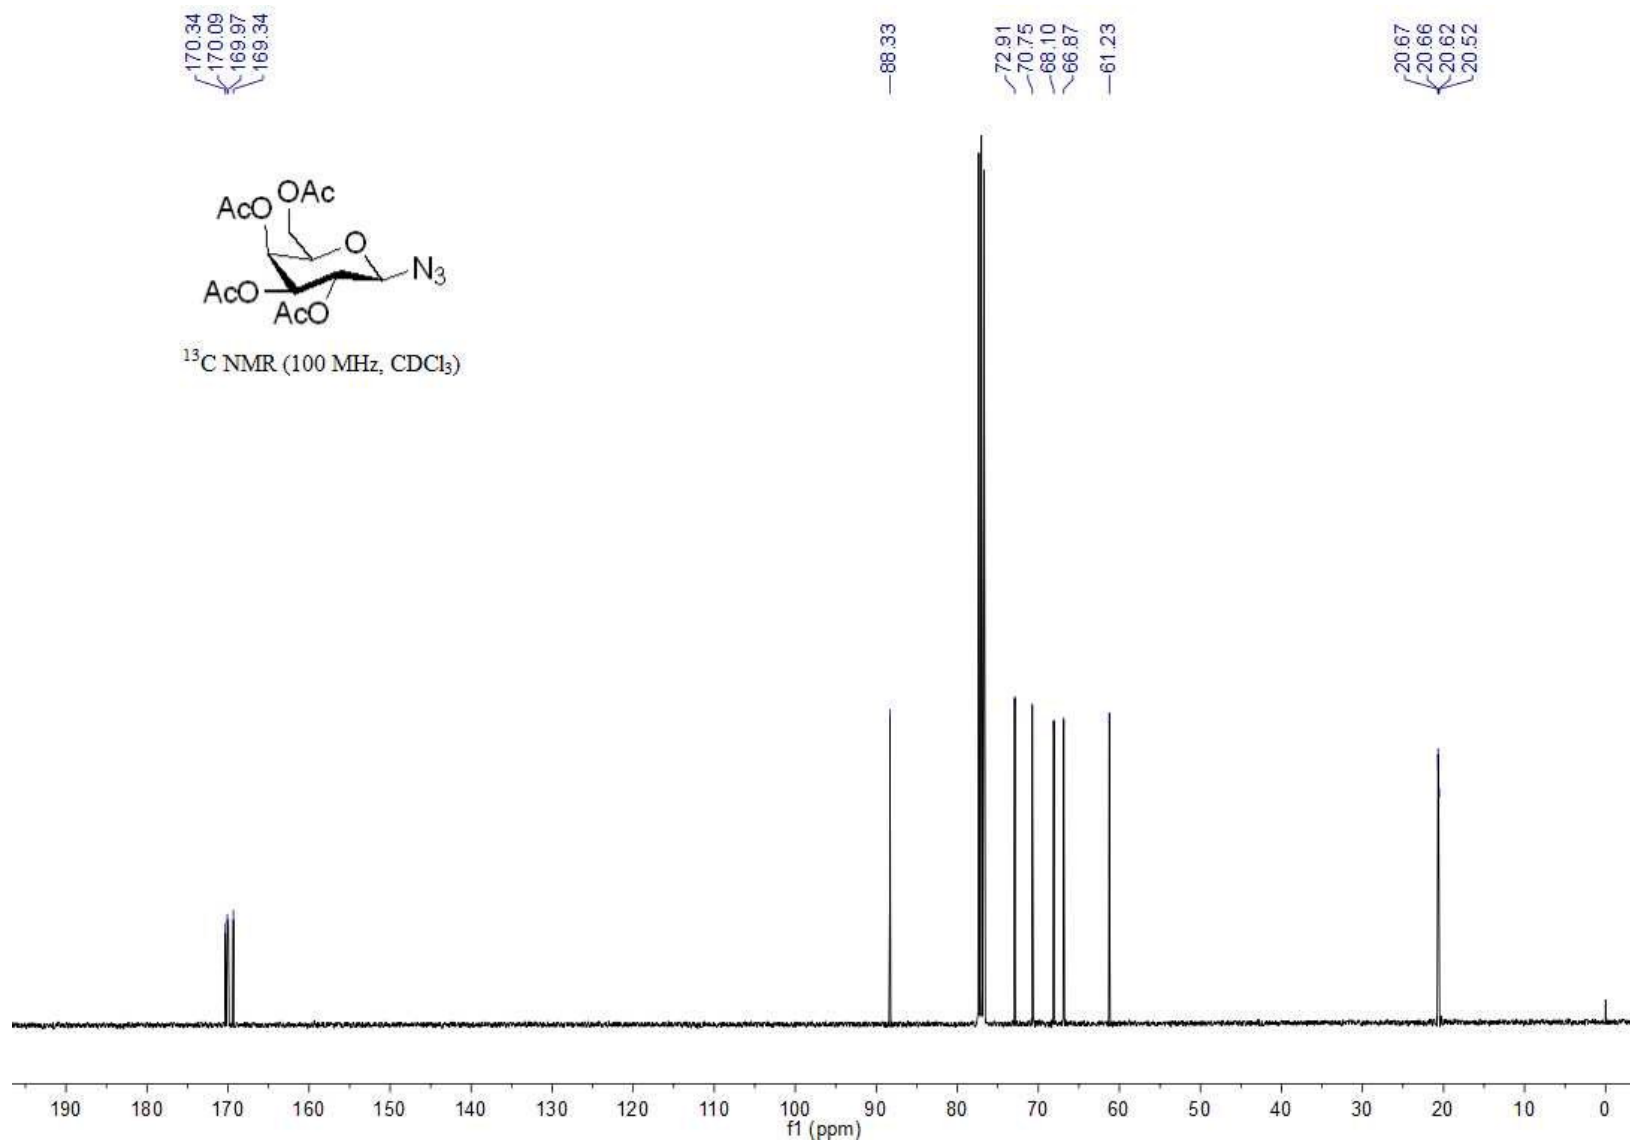

<sup>13</sup>C NMR spectrum of compound 14

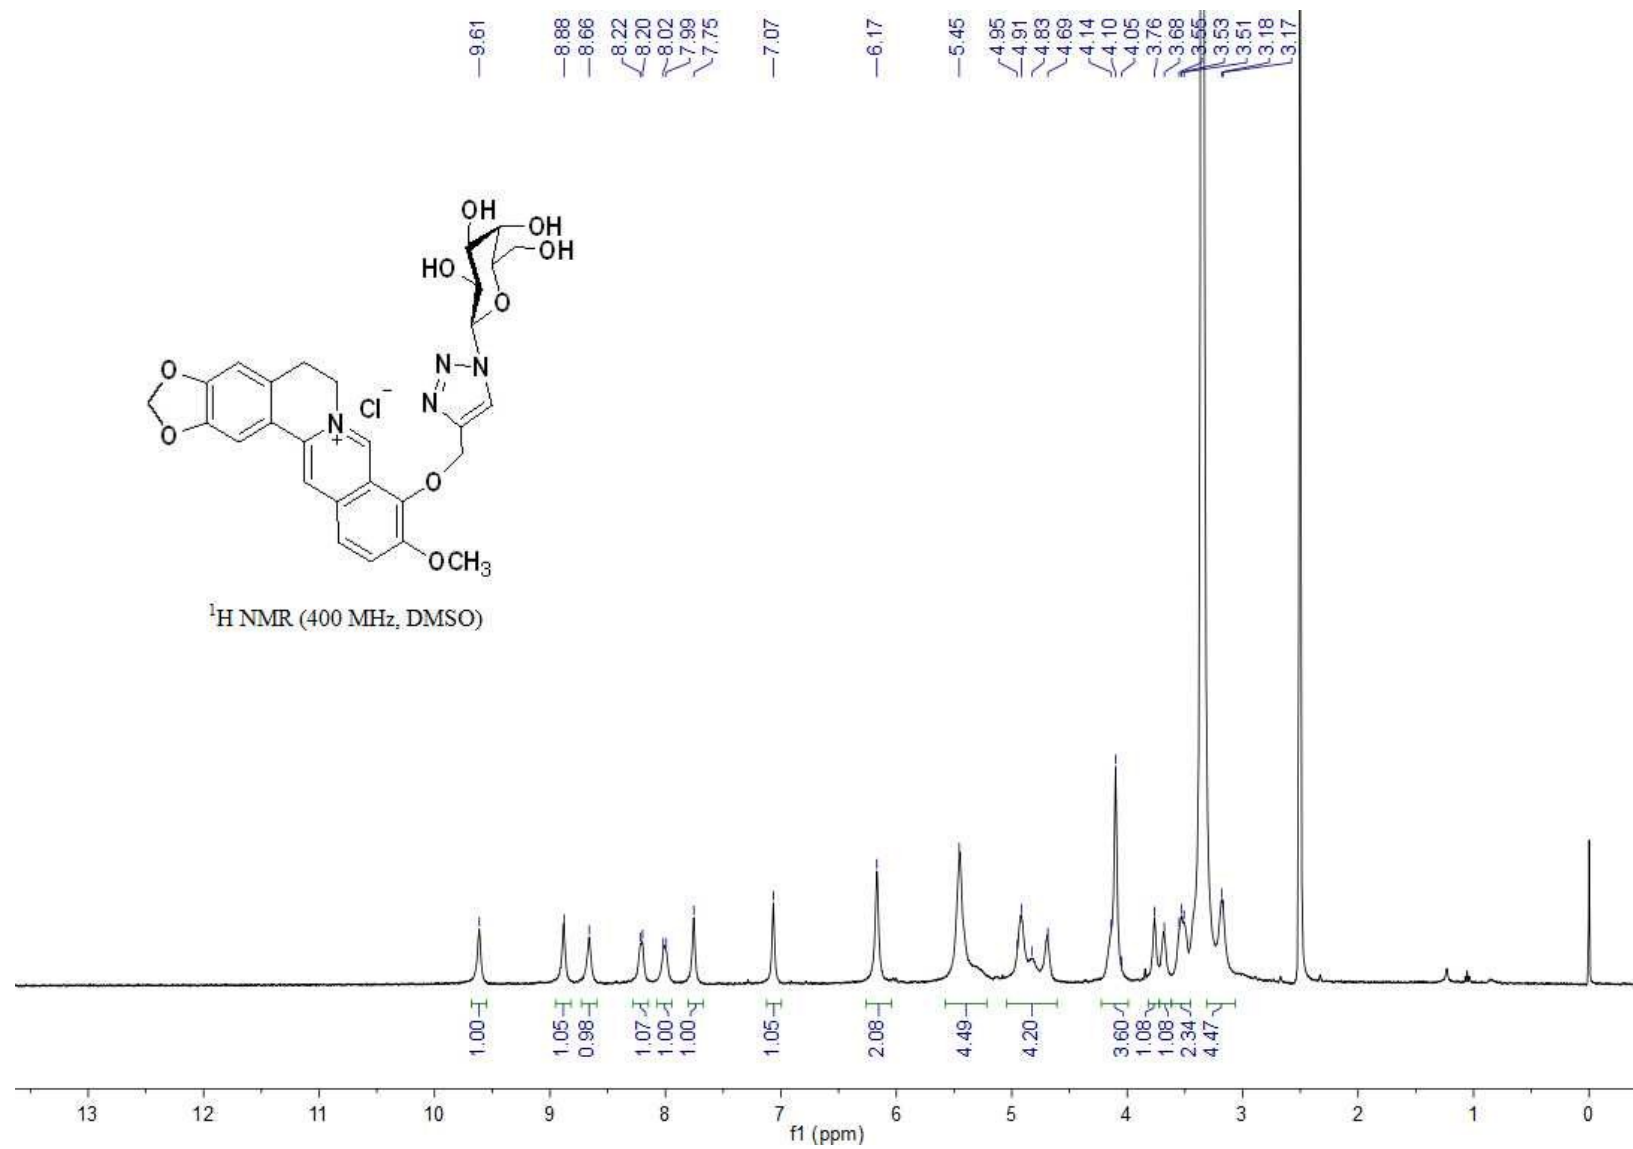

<sup>1</sup>H NMR spectrum of compound 2

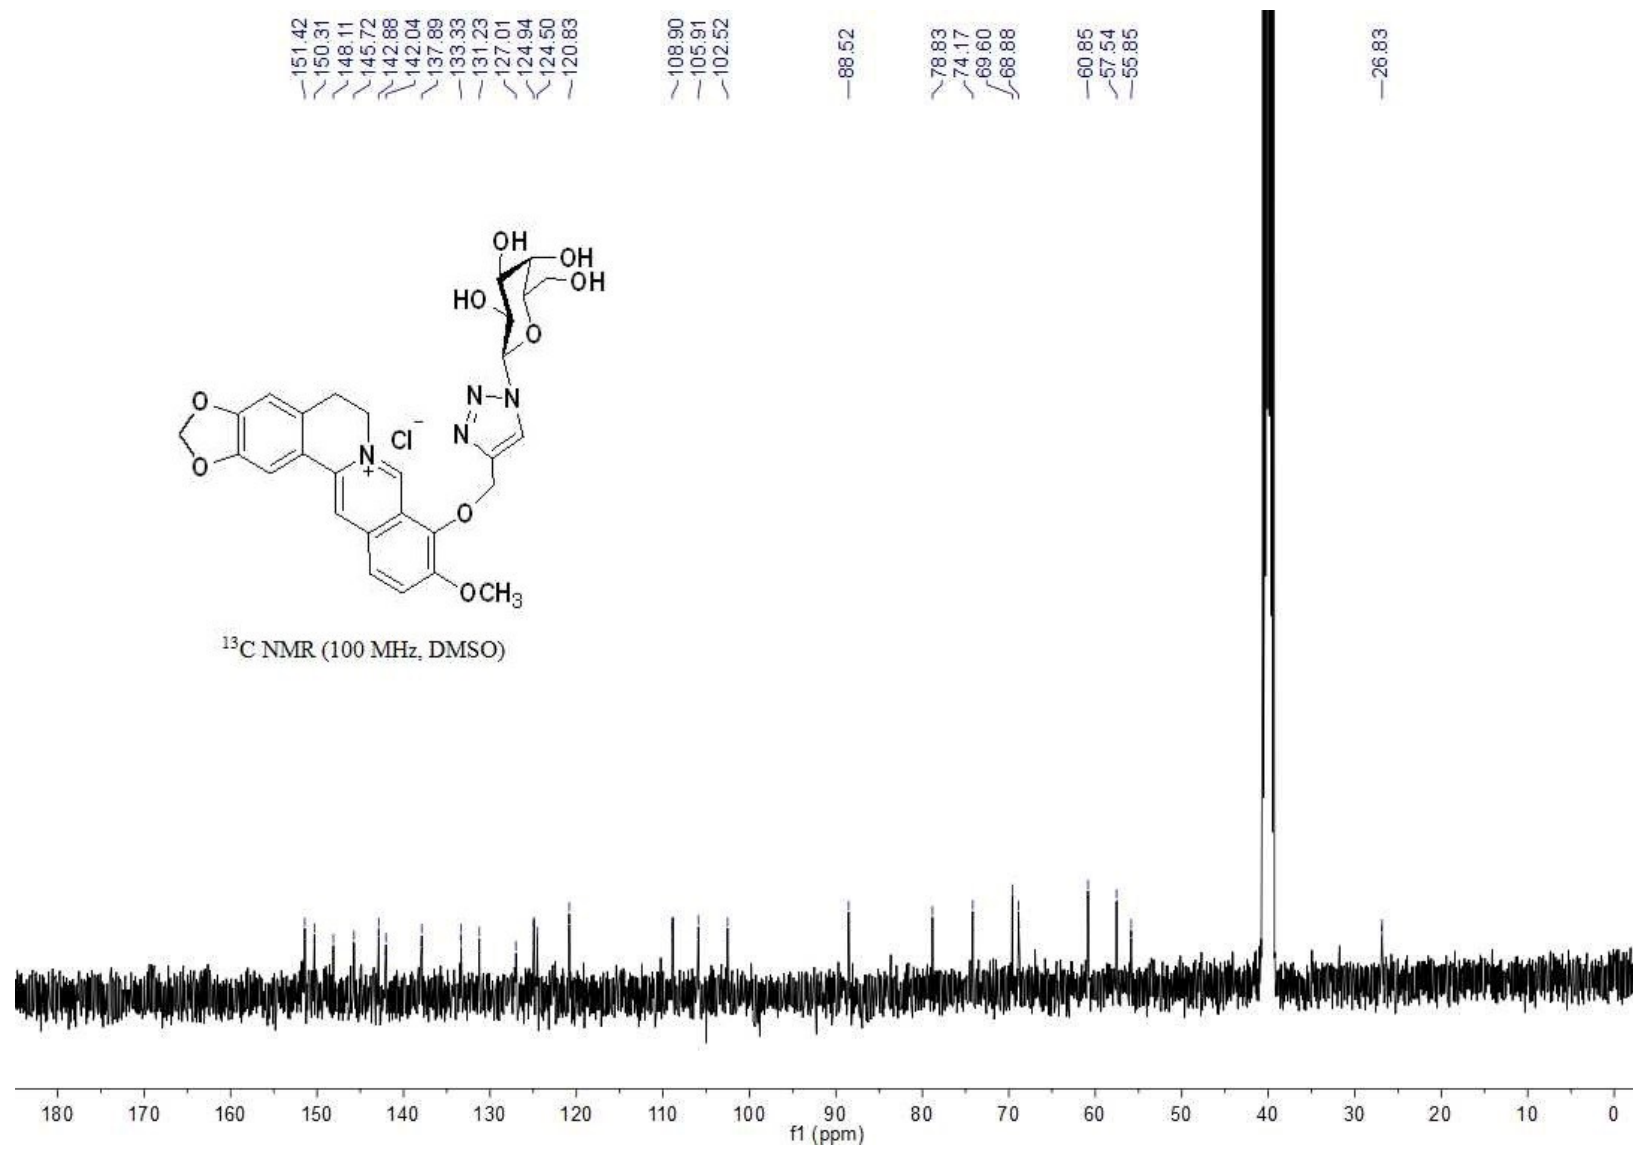

<sup>13</sup>C NMR spectrum of compound 2

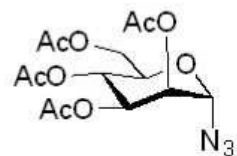

<sup>1</sup>H NMR (400 MHz, CDCl<sub>3</sub>)

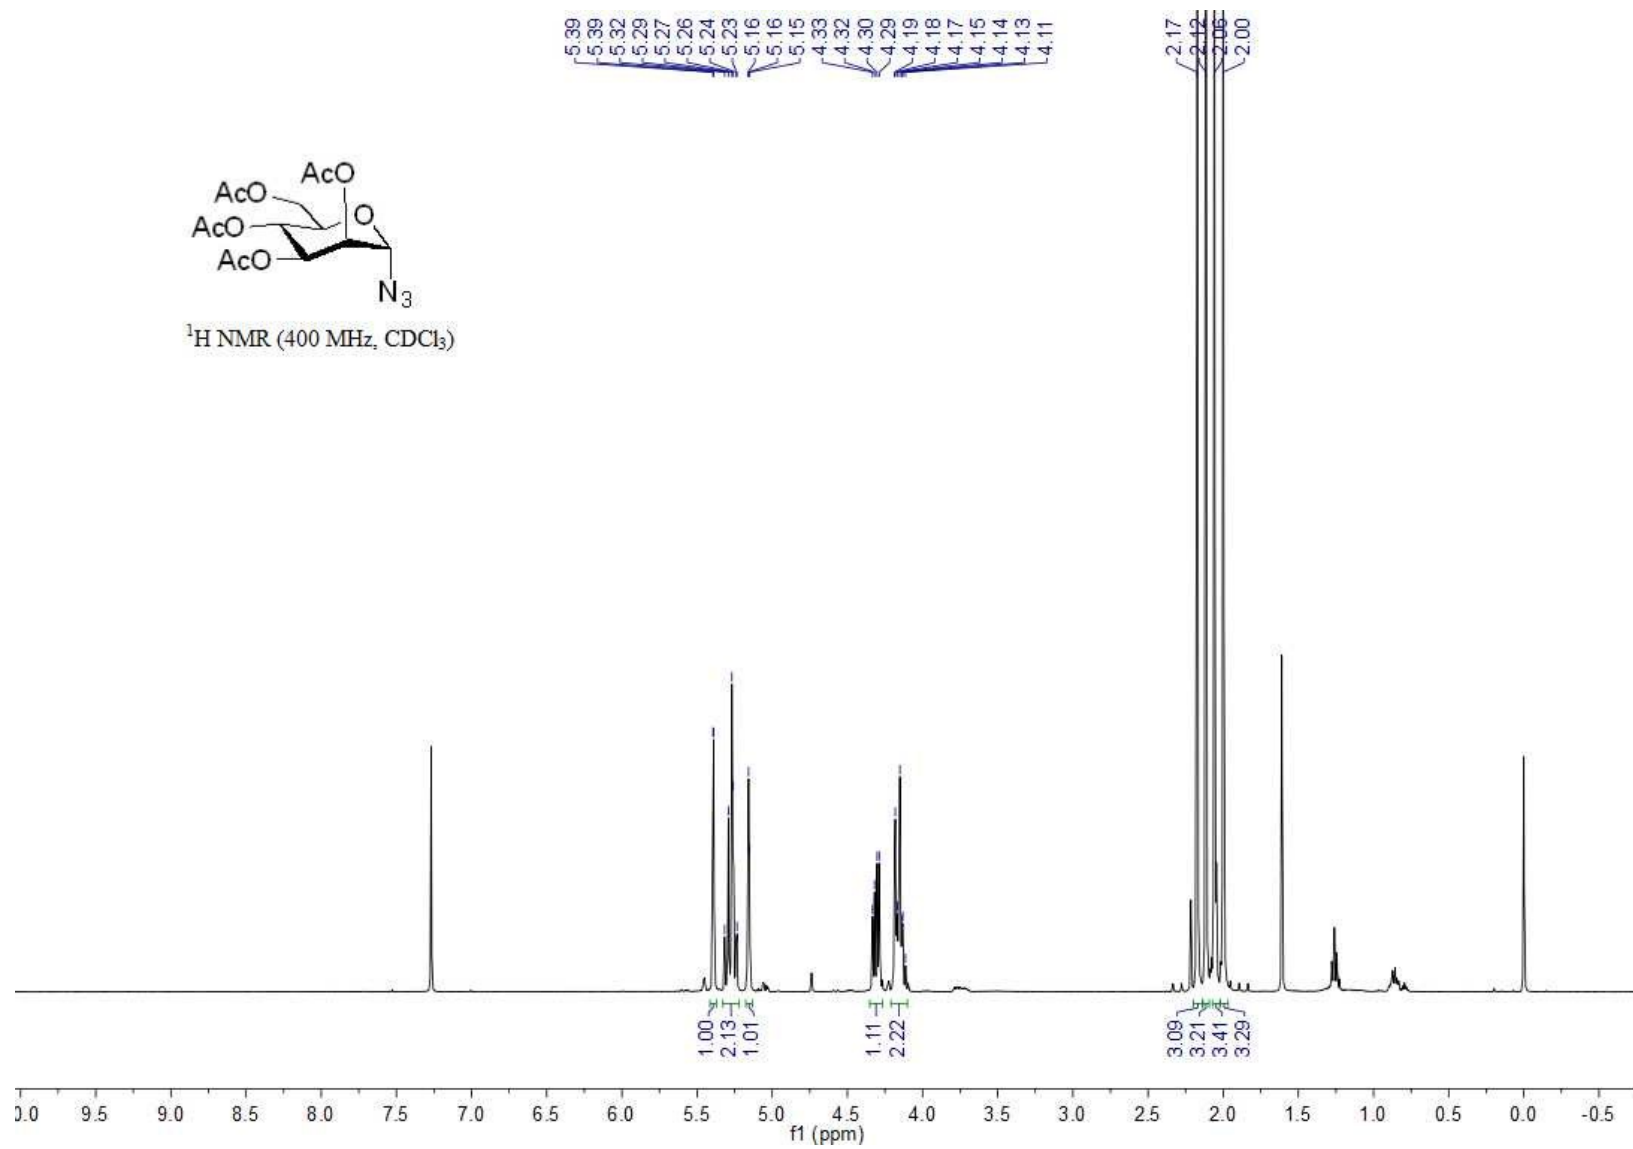

<sup>1</sup>H NMR spectrum of compound **19a**

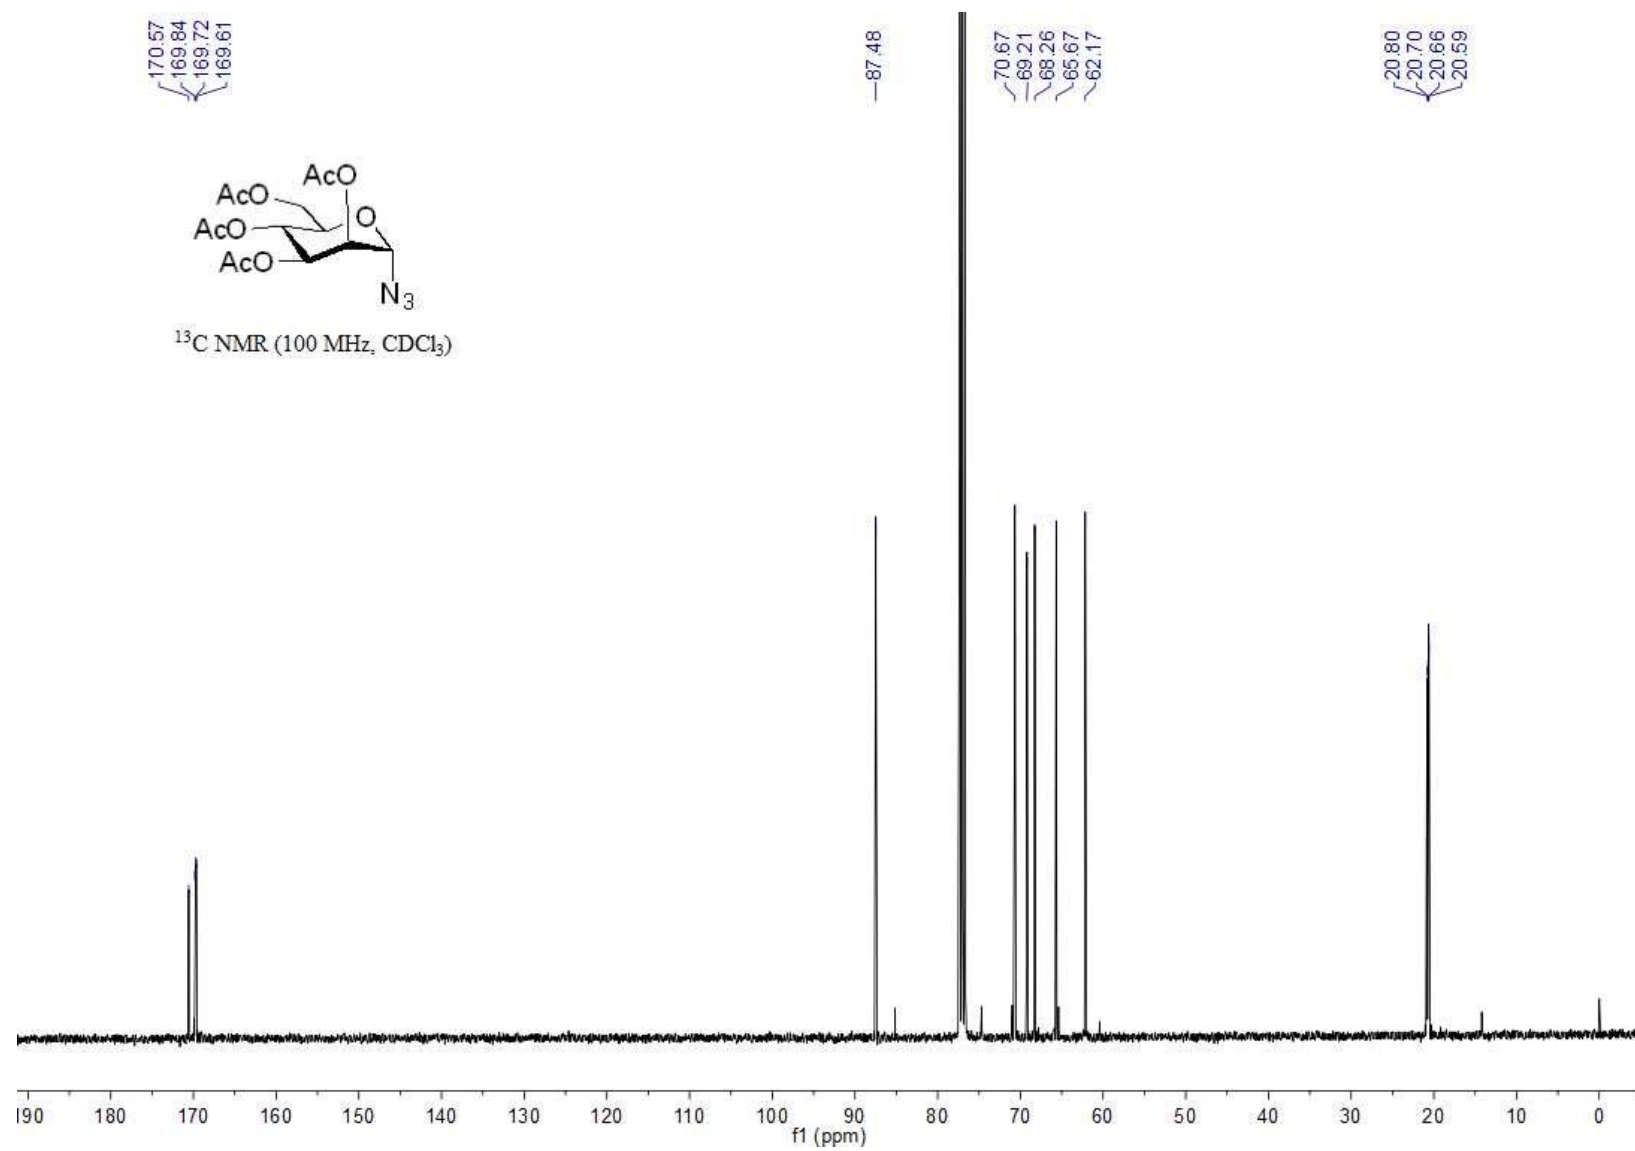

$^{13}\text{C}$  NMR spectrum of compound **19a**

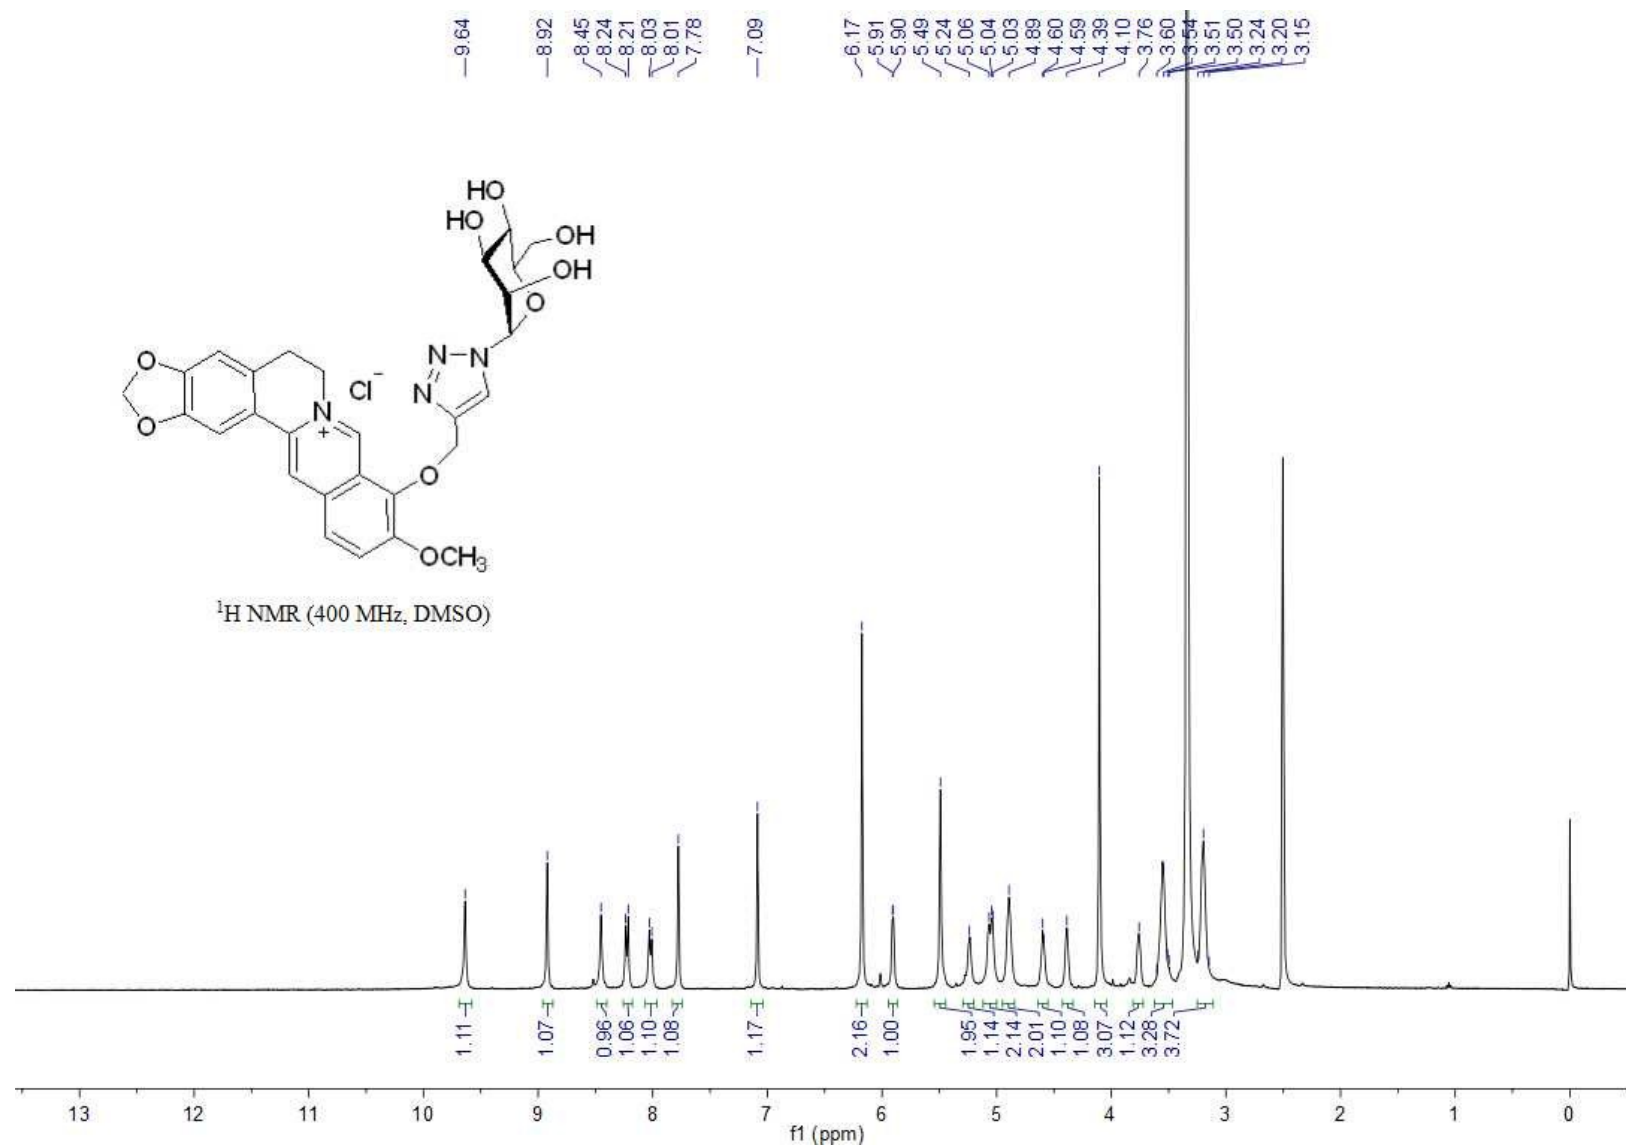

<sup>1</sup>H NMR spectrum of compound **3**

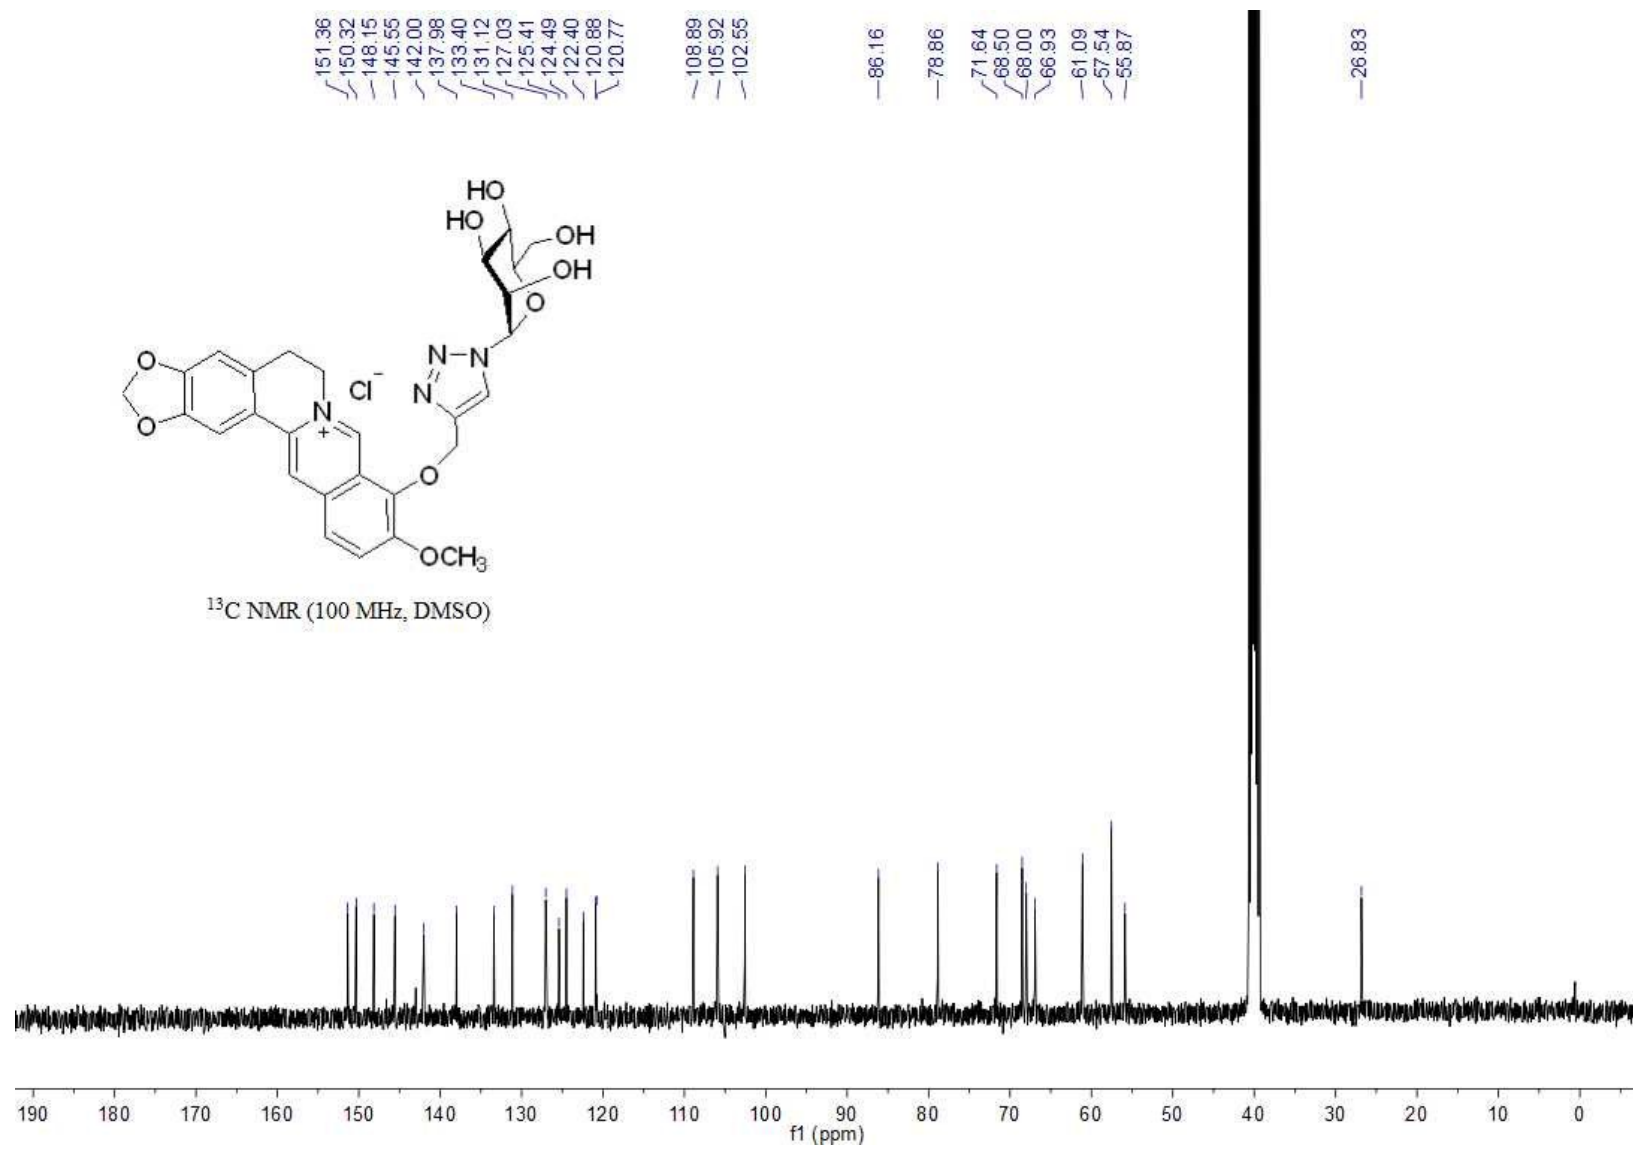

<sup>13</sup>C NMR spectrum of compound 3



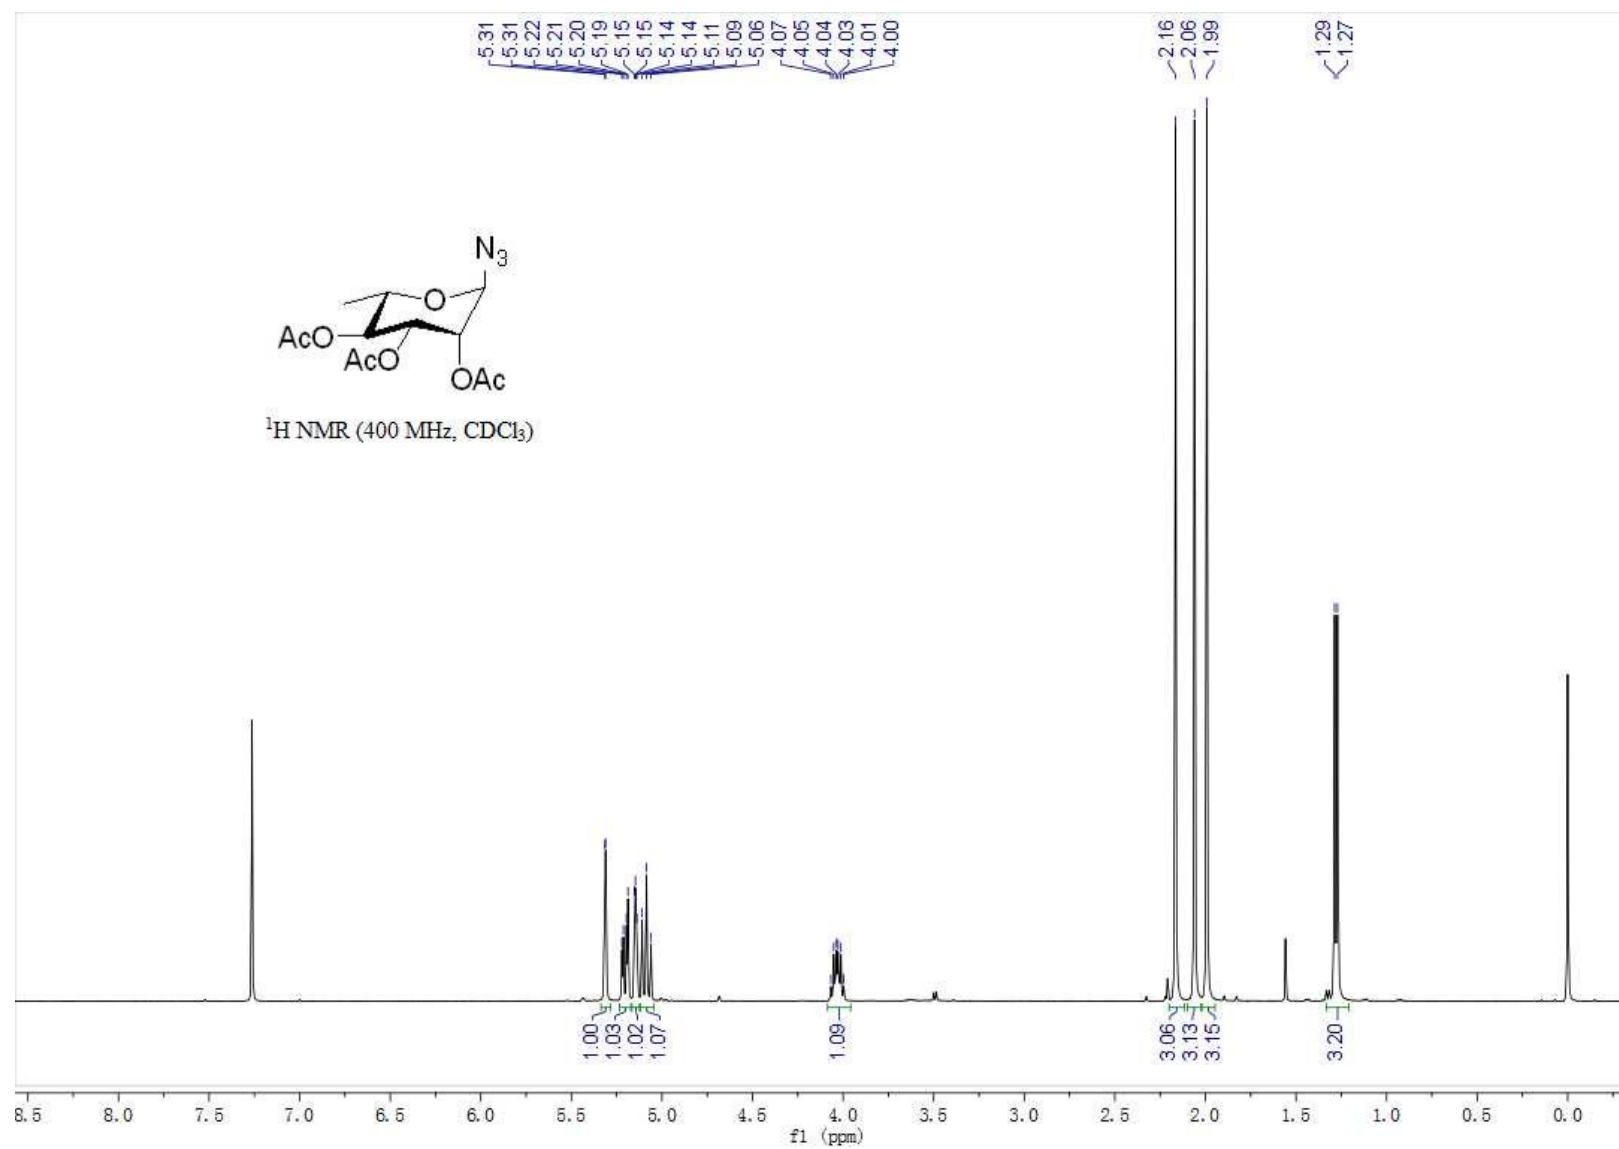

<sup>1</sup>H NMR spectrum of compound 22

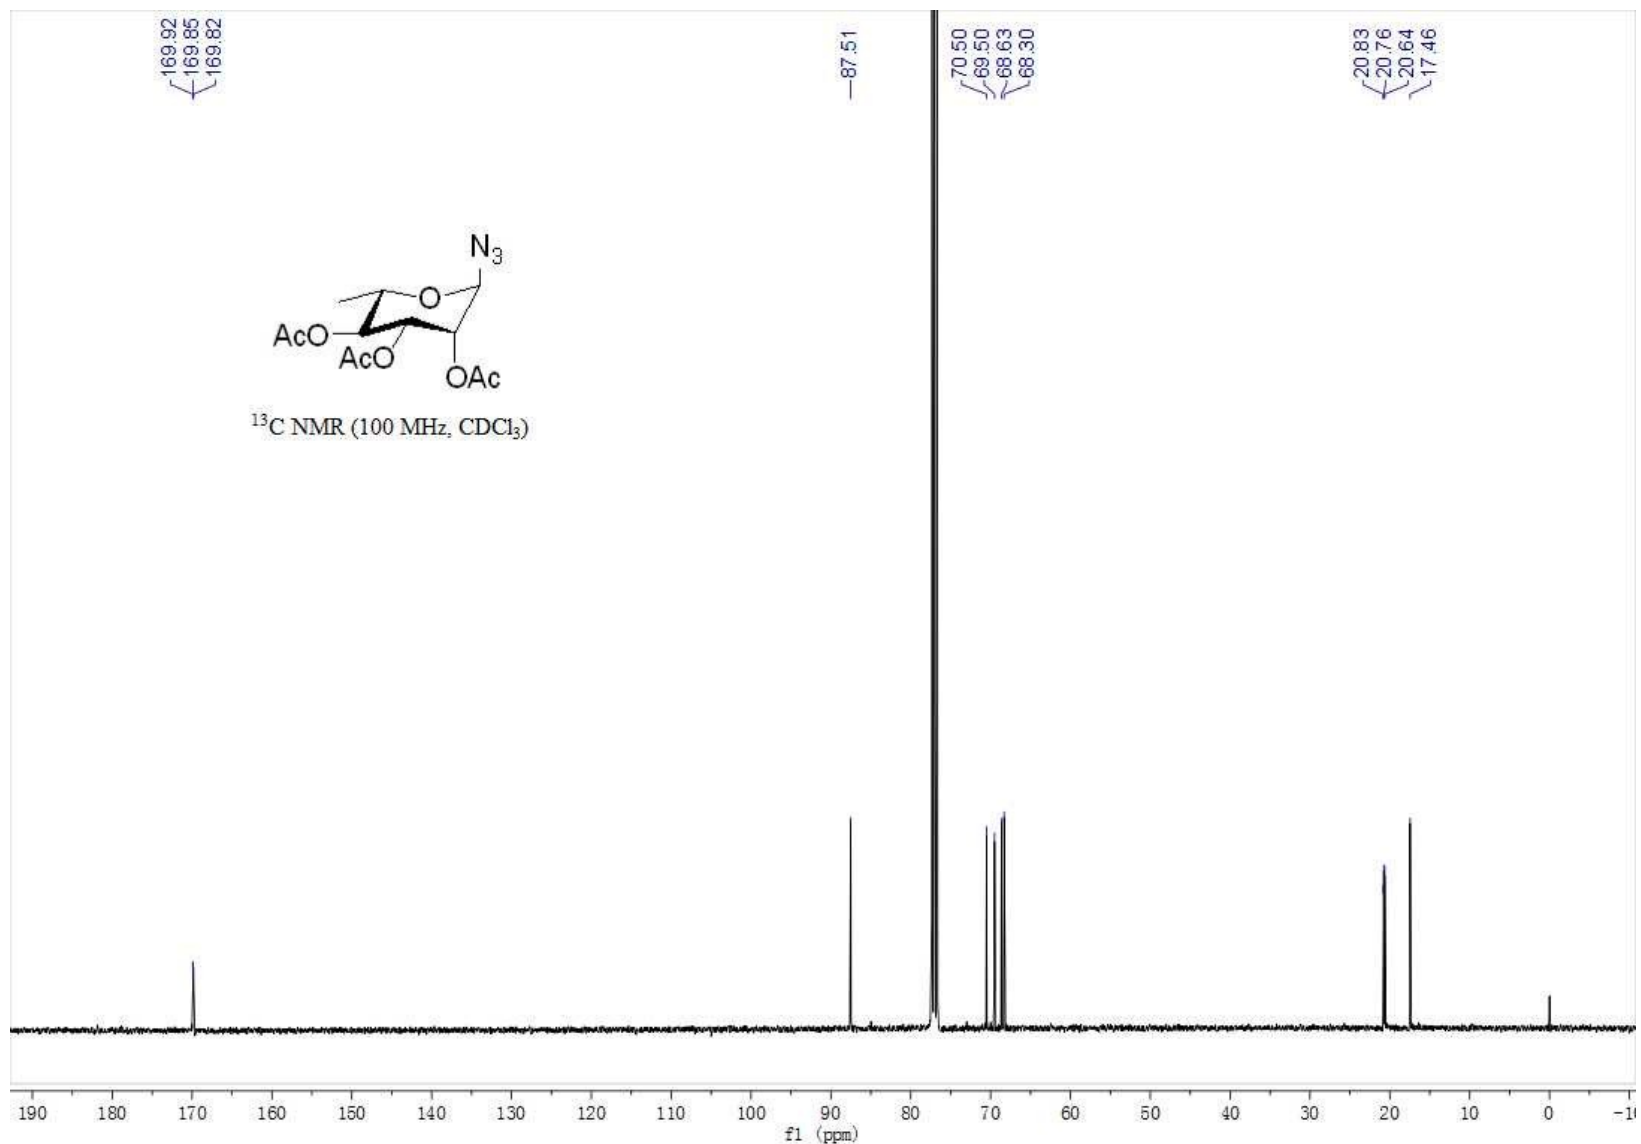

<sup>13</sup>C NMR spectrum of compound **22**

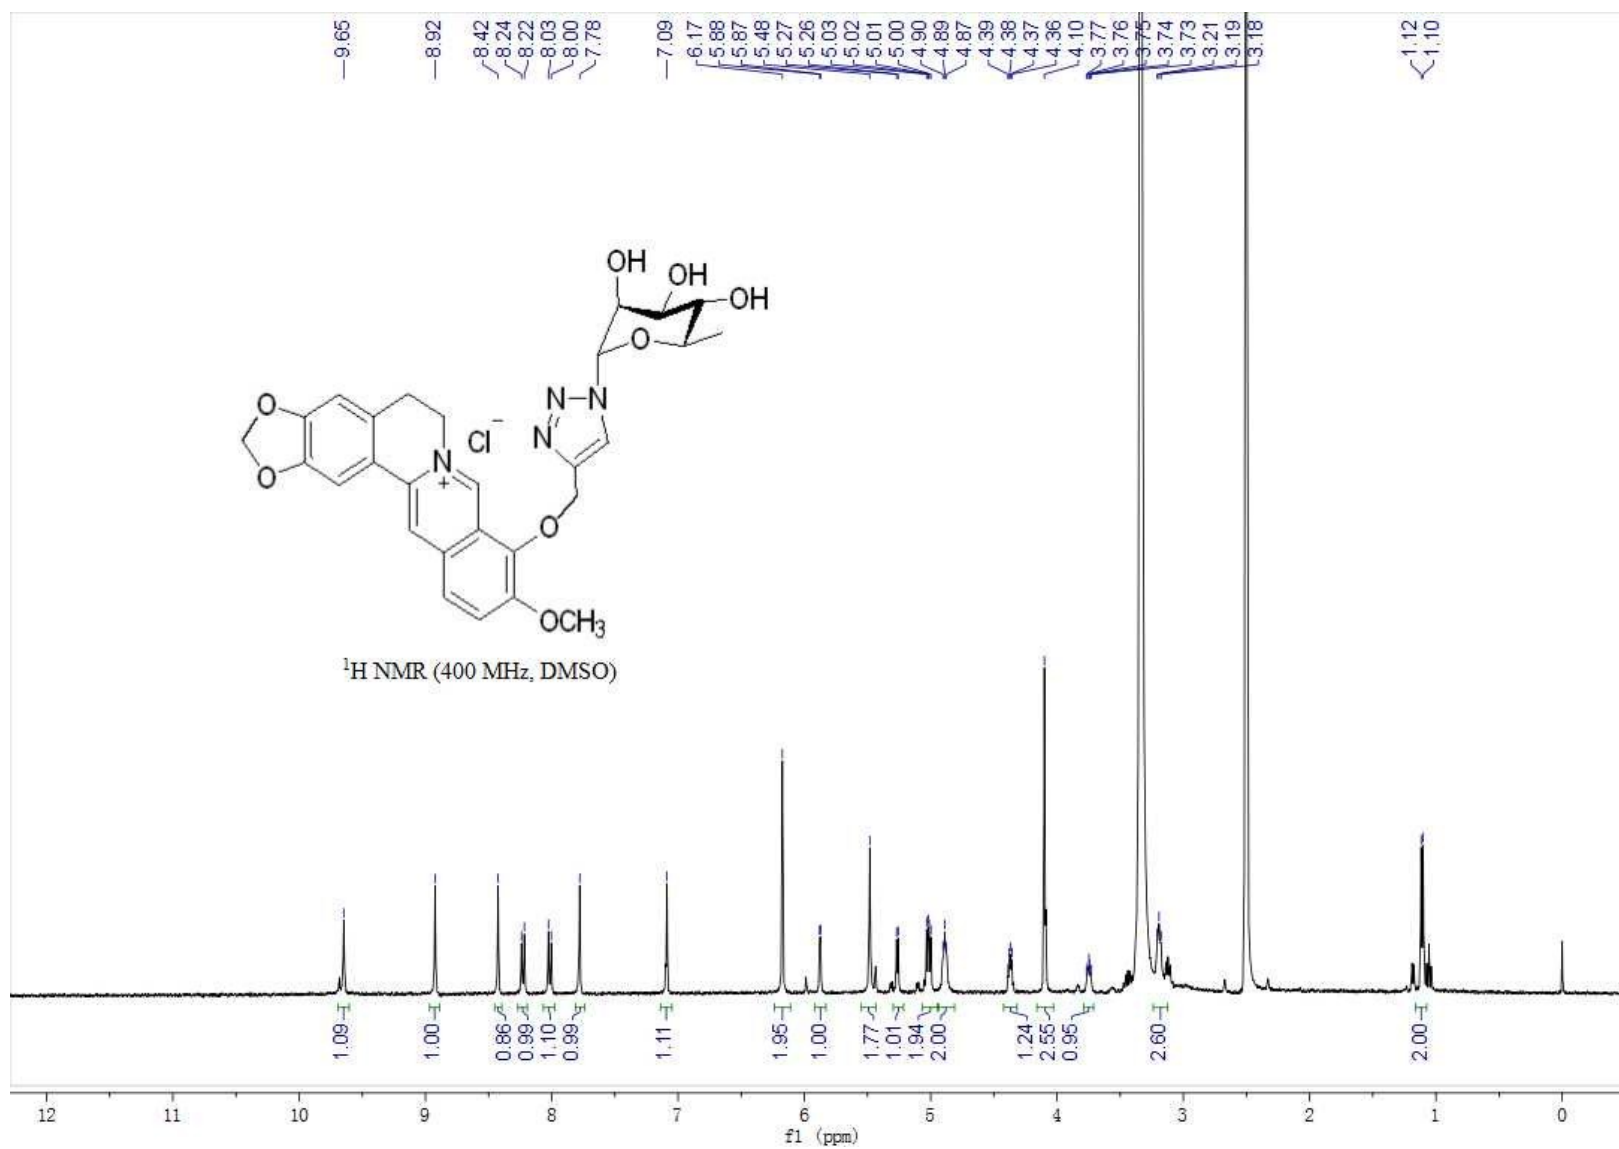

<sup>1</sup>H NMR spectrum of compound 4

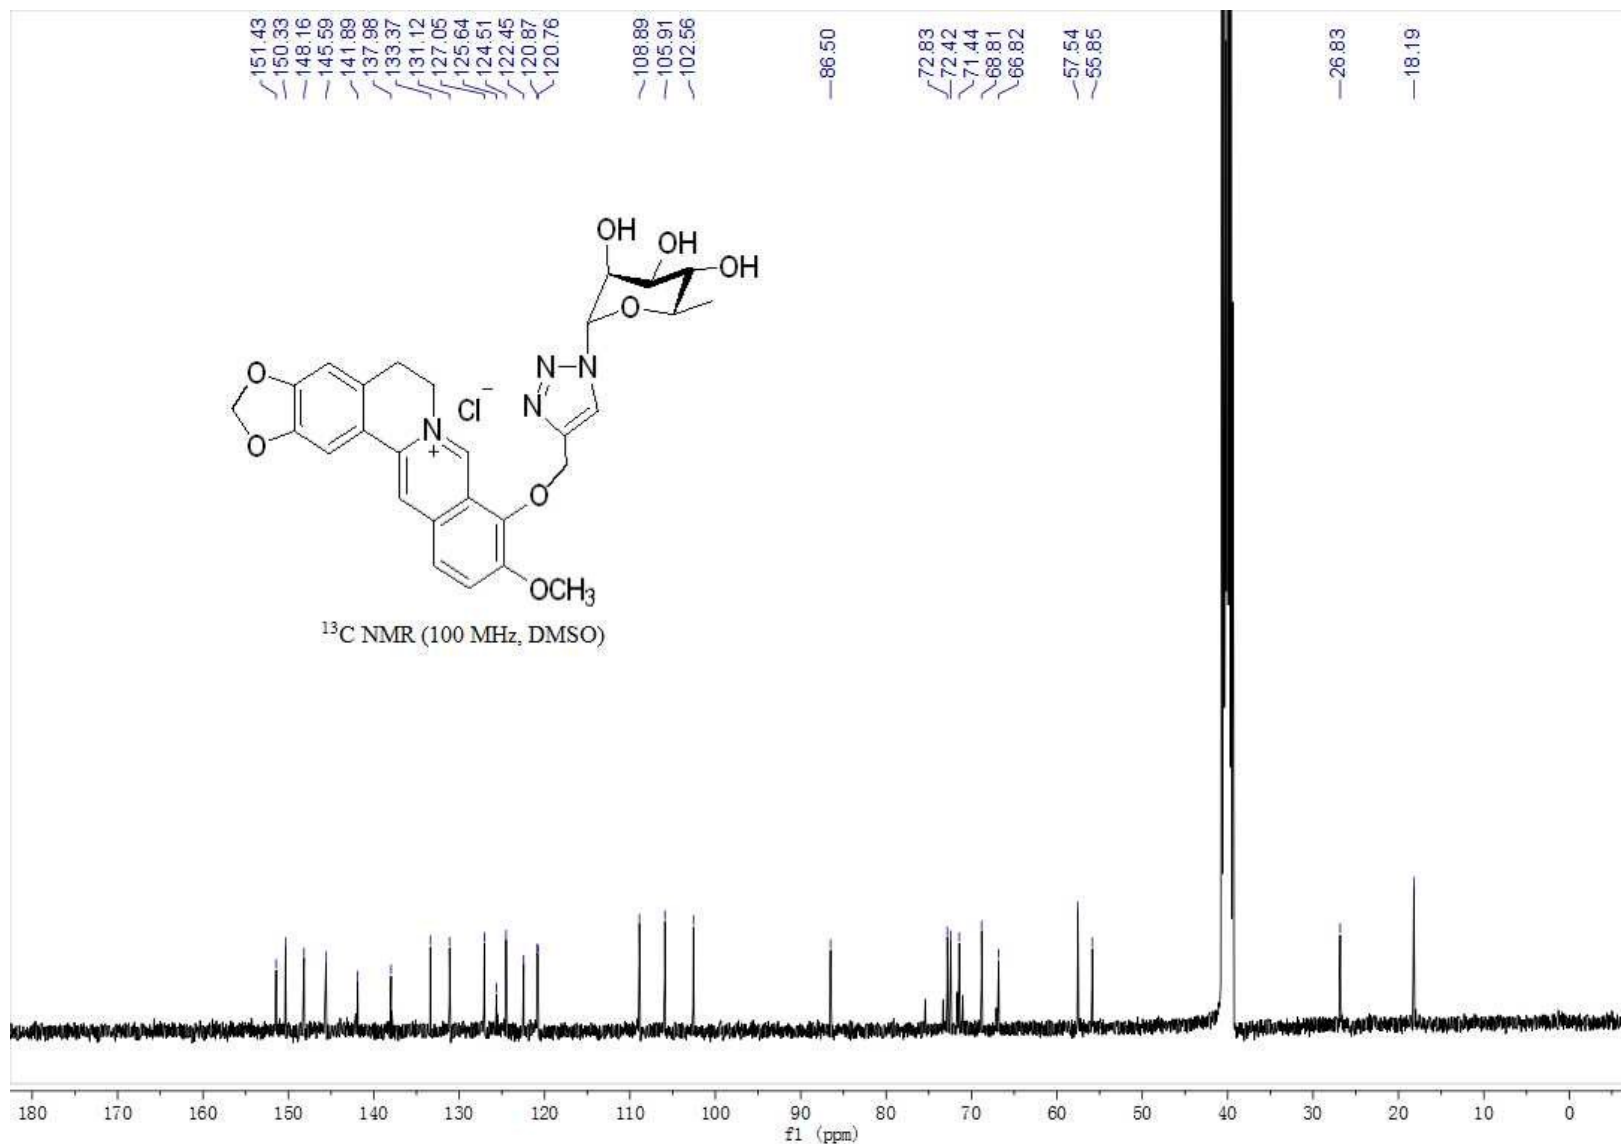

<sup>13</sup>C NMR spectrum of compound 4

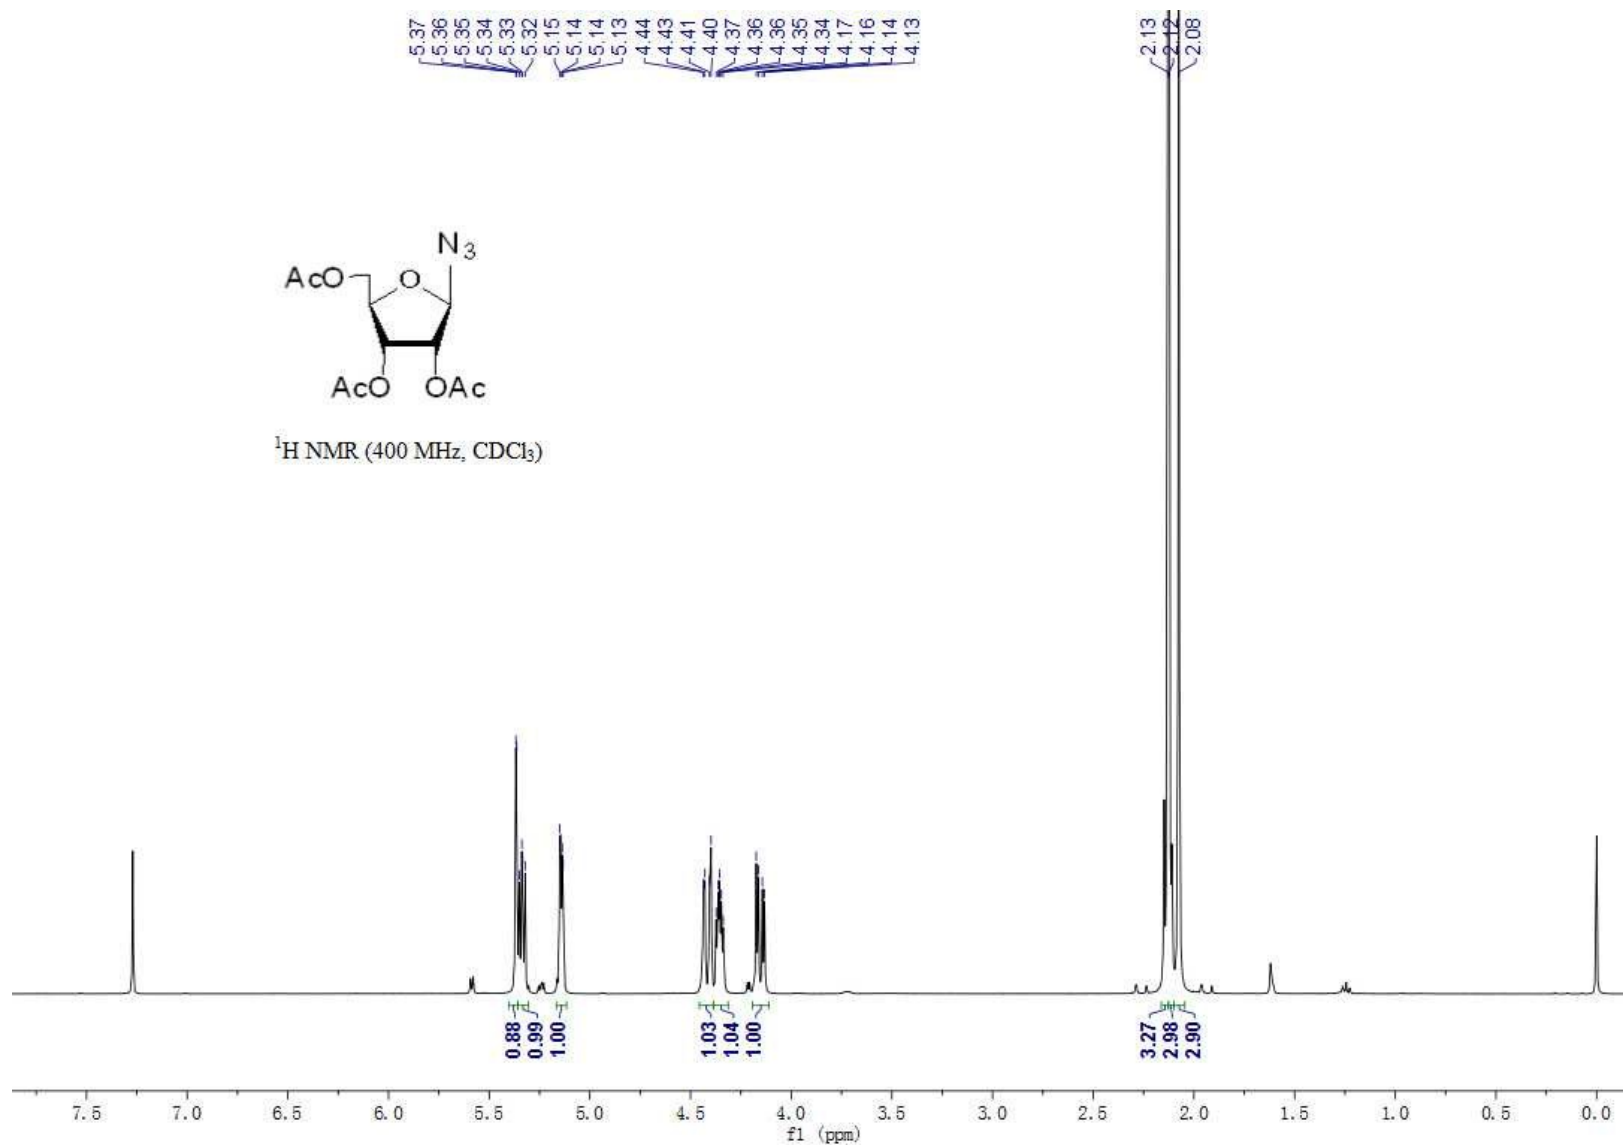

<sup>1</sup>H NMR spectrum of compound 25

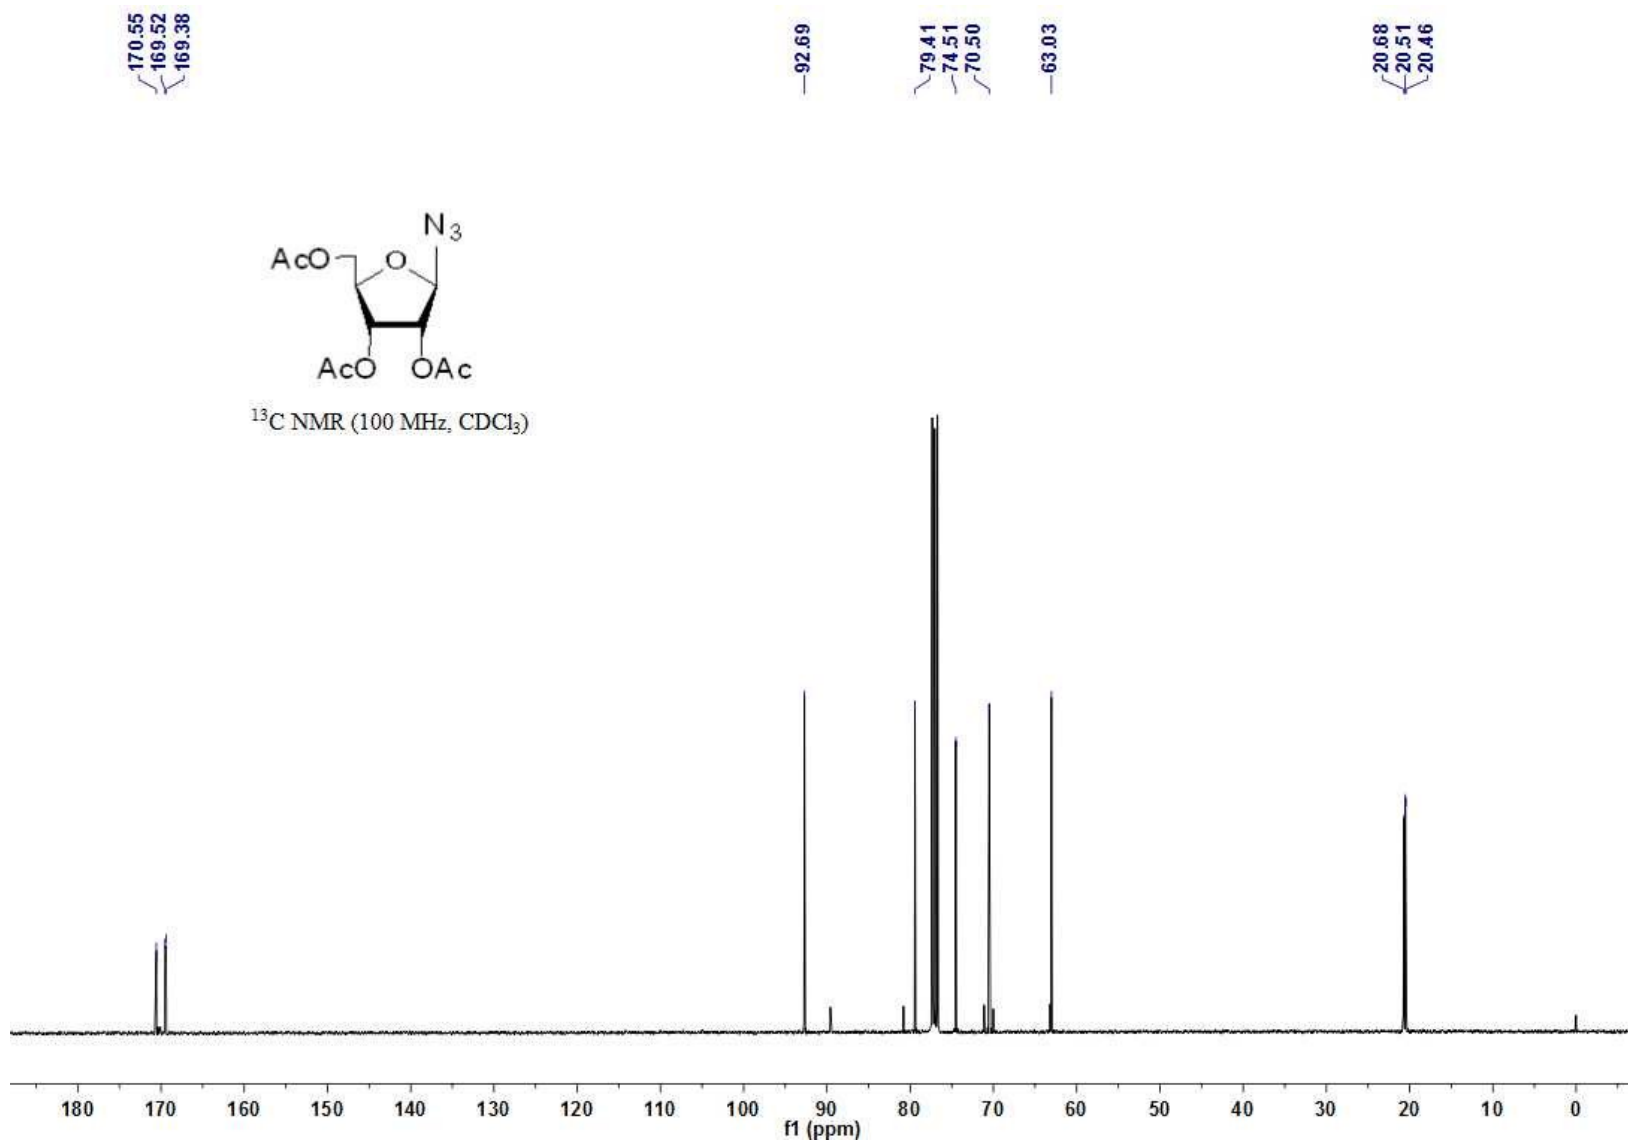

$^{13}\text{C}$  NMR spectrum of compound **25**

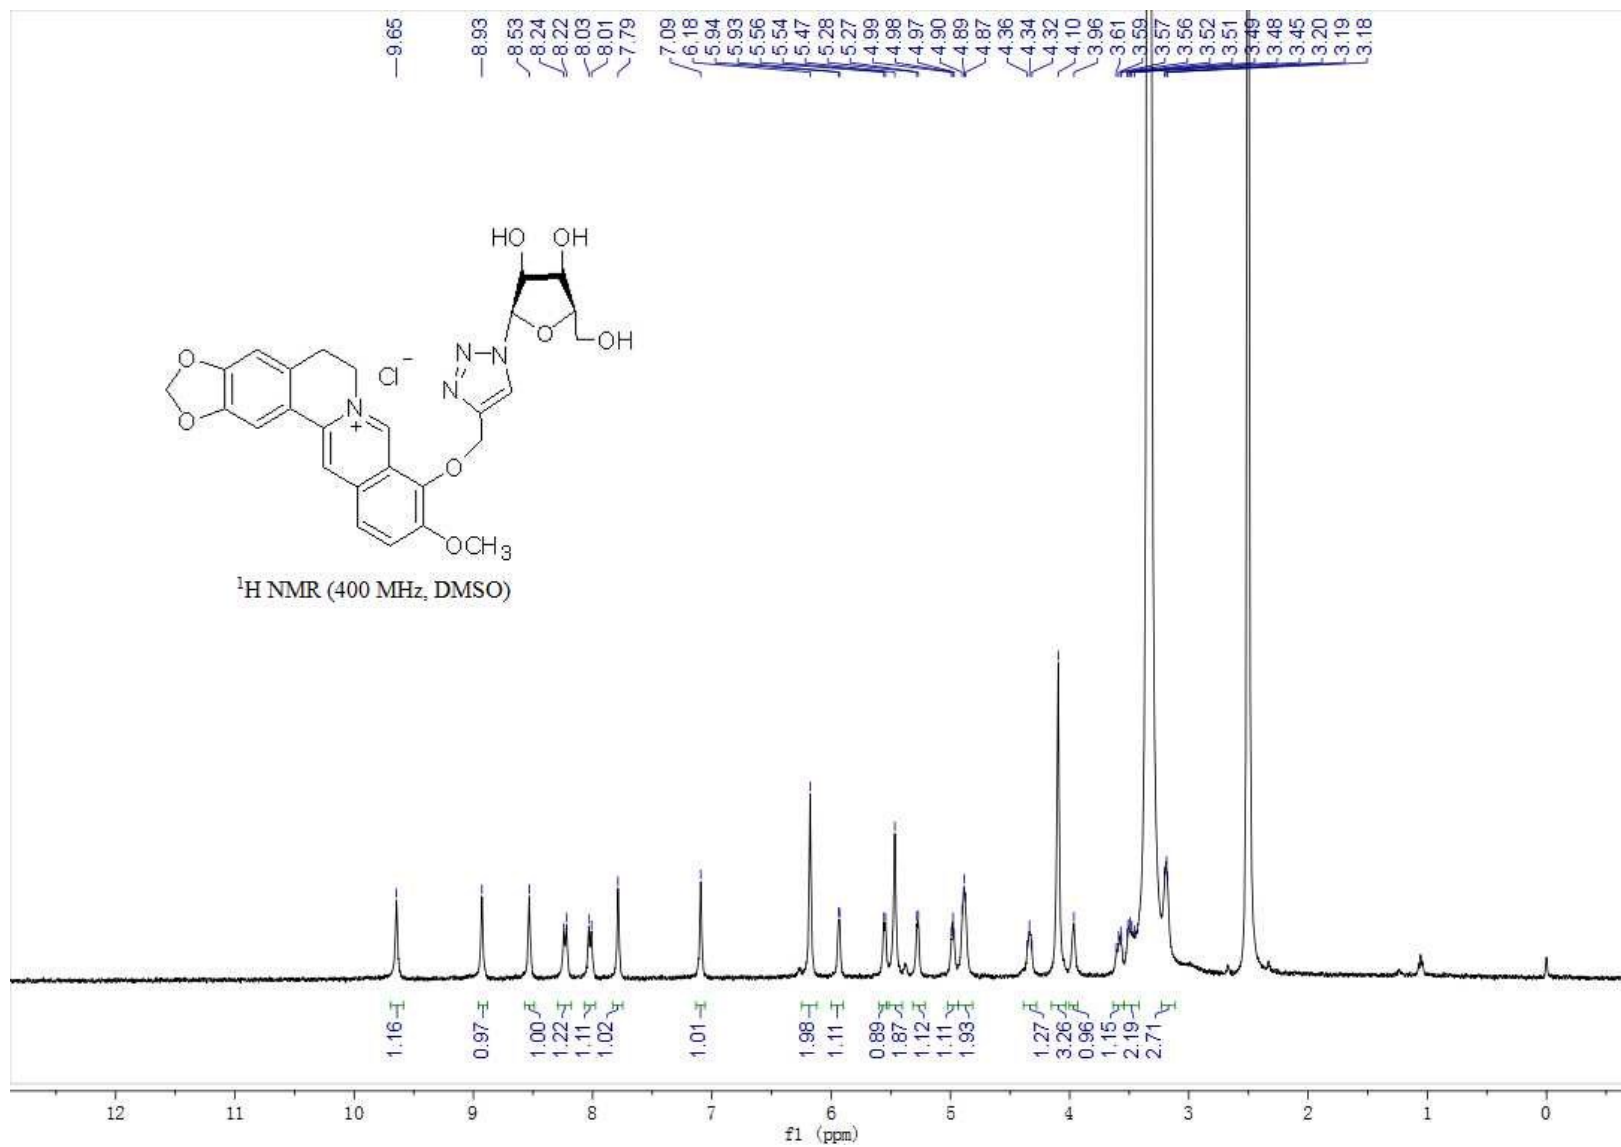

<sup>1</sup>H NMR spectrum of compound 5

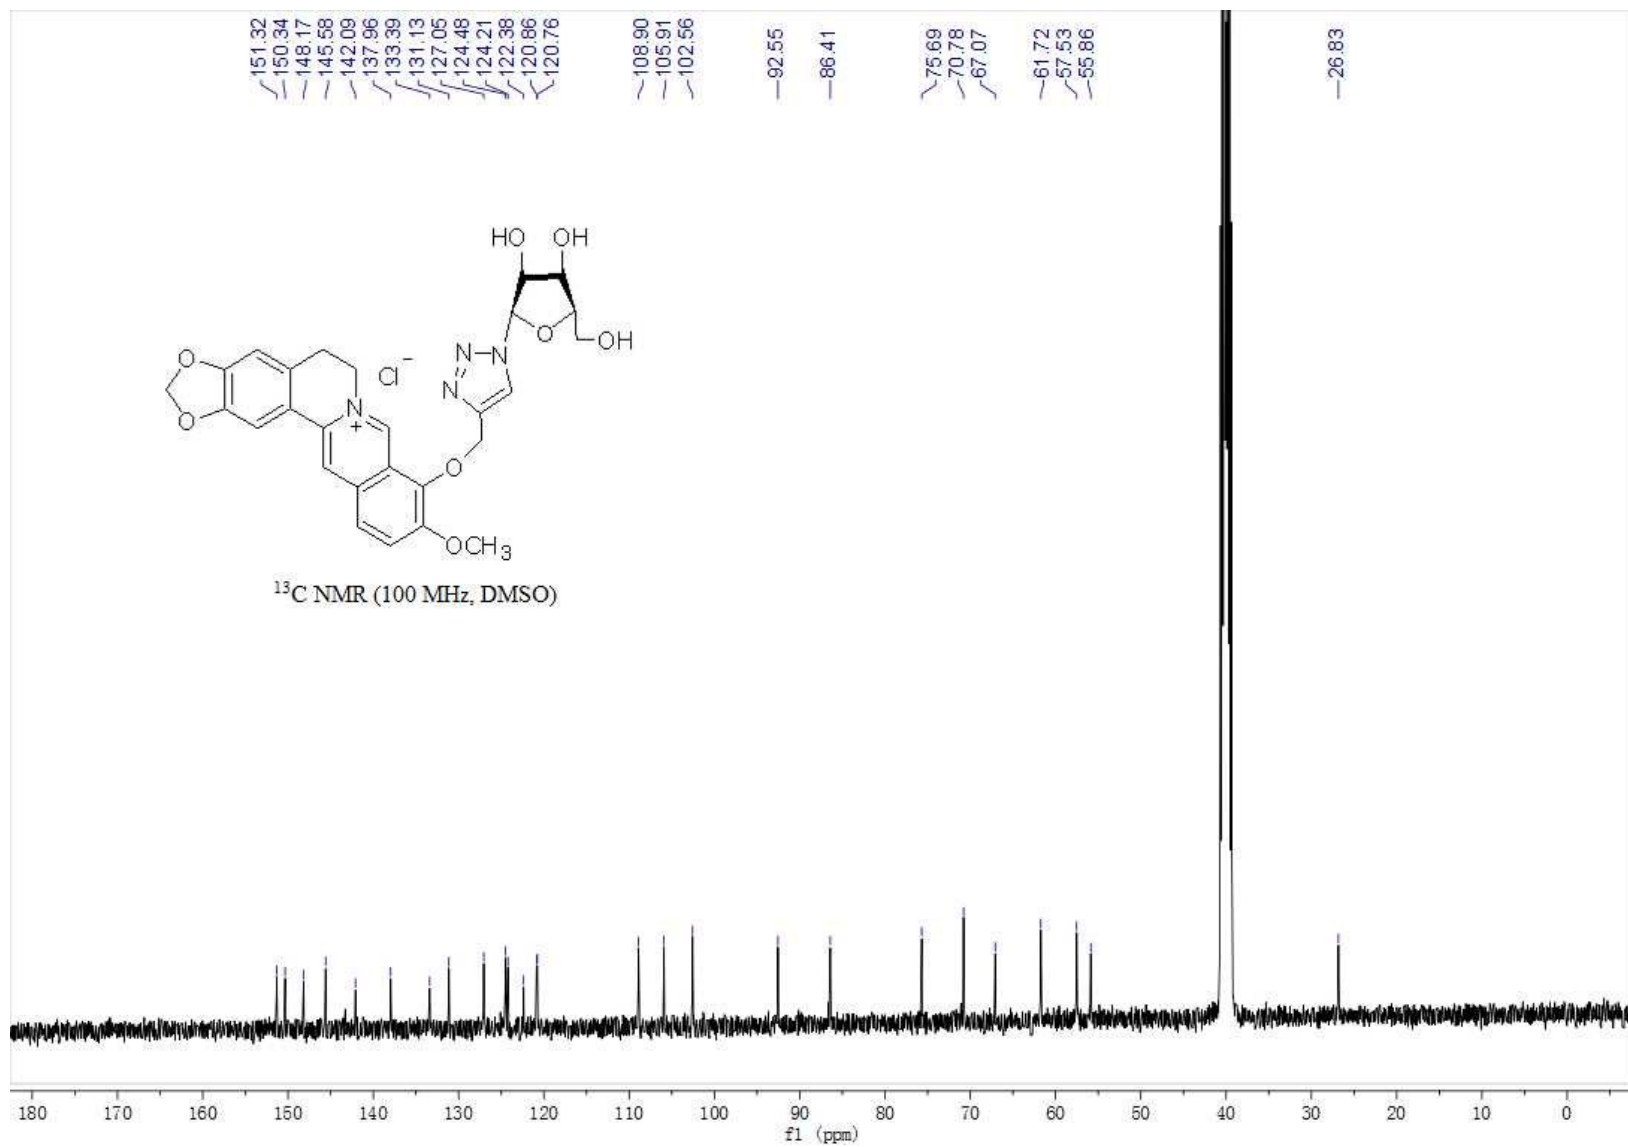

<sup>13</sup>C NMR spectrum of compound 5
